# Supplementary material for: Noble-metal-free BODIPY–cobaloxime photocatalysts for visible-light-driven hydrogen production
Source: Royal Society of Chemistry journal article supplement (doi:10.1039/c4cp03343d), 2014-01-01
Supplement: c4cp03343d1.pdf [file c4cp03343d1.pdf]

Electronic Supplementary Information for *PCCP*

**Electronic Supplementary Information for *PCCP***

**Noble-metal-free BODIPY-cobaloxime photocatalysts  
for visible-light-driven hydrogen production**

**Geng-Geng Luo,<sup>\*a</sup> Kai Fang,<sup>a</sup> Ji-Huai Wu<sup>a</sup>, Jing-Cao Dai<sup>a</sup> and Qing-Hua Zhao<sup>a</sup>**

*<sup>a</sup>College of Materials Science and Engineering, Huaqiao University, Xiamen  
361021, P. R. China*

**Electronic Supplementary Information (ESI):**

**Table S1-S4 & Fig. S1-S11**

**Table S1** Crystallographic data for **B1**, **B2** and **B3**.

| BODIPY                                                    | B1                                                                           | B2                                                                            | B3                                                                           |
|-----------------------------------------------------------|------------------------------------------------------------------------------|-------------------------------------------------------------------------------|------------------------------------------------------------------------------|
| formula                                                   | C <sub>36</sub> H <sub>36</sub> B <sub>2</sub> F <sub>4</sub> N <sub>6</sub> | C <sub>18</sub> H <sub>16</sub> BF <sub>2</sub> I <sub>2</sub> N <sub>3</sub> | C <sub>36</sub> H <sub>36</sub> B <sub>2</sub> F <sub>4</sub> N <sub>6</sub> |
| formula weight                                            | 650.33                                                                       | 576.92                                                                        | 650.33                                                                       |
| crystal system                                            | monoclinic                                                                   | orthorhombic                                                                  | monoclinic                                                                   |
| space group                                               | <i>P2<sub>1</sub>/c</i>                                                      | <i>Cmcm</i>                                                                   | <i>P2<sub>1</sub></i>                                                        |
| <i>a</i> (Å)                                              | 24.7836(17)                                                                  | 16.771(3)                                                                     | 7.1055(3)                                                                    |
| <i>b</i> (Å)                                              | 6.7289(3)                                                                    | 15.274(3)                                                                     | 12.1329(6)                                                                   |
| <i>c</i> (Å)                                              | 20.9423(13)                                                                  | 7.6839(15)                                                                    | 19.1171(7)                                                                   |
| $\alpha$ (deg)                                            | 90                                                                           | 90                                                                            | 90                                                                           |
| $\beta$ (deg)                                             | 114.264(8)                                                                   | 90                                                                            | 96.1670(10)                                                                  |
| $\gamma$ (deg)                                            | 90                                                                           | 90                                                                            | 90                                                                           |
| <i>Z</i> , <i>D</i> <sub>calcd</sub> (g m <sup>-3</sup> ) | 4, 1.357                                                                     | 4, 1.933                                                                      | 2, 1.318                                                                     |
| <i>V</i> (Å <sup>3</sup> )                                | 3184.0(3)                                                                    | 1968.3(7)                                                                     | 1638.55(12)                                                                  |
| $\mu$ (mm <sup>-1</sup> )                                 | 0.10                                                                         | 3.22                                                                          | 0.09                                                                         |
| <i>F</i> (000)                                            | 1360                                                                         | 1080                                                                          | 434                                                                          |
| <i>T</i> (K)                                              | 173(2)                                                                       | 173(2)                                                                        | 173(2)                                                                       |
| no. of reflns collected                                   | 18476                                                                        | 7664                                                                          | 10658                                                                        |
| no. of unique reflns.                                     | 5589 ( <i>R</i> <sub>int</sub> = 0.024)                                      | 975 ( <i>R</i> <sub>int</sub> = 0.055)                                        | 5660 ( <i>R</i> <sub>int</sub> = 0.046)                                      |
| no. of observed reflns                                    | 4716                                                                         | 794                                                                           | 3869                                                                         |
| parameters                                                | 433                                                                          | 505                                                                           | 434                                                                          |
| R indices                                                 | <i>R</i> <sub>1</sub> = 0.0517,                                              | <i>R</i> <sub>1</sub> = 0.0522,                                               | <i>R</i> <sub>1</sub> = 0.0608,                                              |
| [ <i>I</i> > 2 $\sigma$ ( <i>I</i> )] <sup>a,b</sup>      | <i>wR</i> <sub>2</sub> = 0.1432                                              | <i>wR</i> <sub>2</sub> = 0.1526                                               | <i>wR</i> <sub>2</sub> = 0.1536                                              |
| R indices                                                 | <i>R</i> <sub>1</sub> = 0.0612,                                              | <i>R</i> <sub>1</sub> = 0.0612,                                               | <i>R</i> <sub>1</sub> = 0.1067,                                              |
| all data                                                  | <i>wR</i> <sub>2</sub> = 0.1523                                              | <i>wR</i> <sub>2</sub> = 0.1896                                               | <i>wR</i> <sub>2</sub> = 0.2339                                              |
| GOF                                                       | 1.012                                                                        | 1.086                                                                         | 1.165                                                                        |
| Max., min electron                                        | 0.50, -0.45                                                                  | 1.40, -1.05                                                                   | 0.38, -0.38                                                                  |
| Density (e Å <sup>-3</sup> )                              |                                                                              |                                                                               |                                                                              |

$$^a R_1 = \sum | |F_o| - |F_c| | / \sum |F_o|, \quad ^b wR_2 = [\sum w(F_o^2 - F_c^2)^2] / \sum w(F_o^2)^2]^{1/2}$$

**Table S2** Crystallographic data for **Co-B1**, **Co-B2** and **Co-B3**.

| BODIPY                                                    | Co-B1                                                                             | Co-B2                                                                                            | Co-B3                                                                             |
|-----------------------------------------------------------|-----------------------------------------------------------------------------------|--------------------------------------------------------------------------------------------------|-----------------------------------------------------------------------------------|
| formula                                                   | C <sub>26</sub> H <sub>32</sub> BClCoF <sub>2</sub> N <sub>7</sub> O <sub>4</sub> | C <sub>26</sub> H <sub>30</sub> BClCoF <sub>2</sub> I <sub>2</sub> N <sub>7</sub> O <sub>4</sub> | C <sub>26</sub> H <sub>32</sub> BClCoF <sub>2</sub> N <sub>7</sub> O <sub>4</sub> |
| formula weight                                            | 650.33                                                                            | 901.56                                                                                           | 649.78                                                                            |
| crystal system                                            | monoclinic                                                                        | monoclinic                                                                                       | monoclinic                                                                        |
| space group                                               | <i>P</i> 2 <sub>1</sub> / <i>c</i>                                                | <i>P</i> 2 <sub>1</sub> / <i>n</i>                                                               | <i>C</i> 2/ <i>m</i>                                                              |
| <i>a</i> (Å)                                              | 14.3736(11)                                                                       | 8.6580(3)                                                                                        | 32.1886(10)                                                                       |
| <i>b</i> (Å)                                              | 14.8242(11)                                                                       | 13.6093(5)                                                                                       | 13.8873(5)                                                                        |
| <i>c</i> (Å)                                              | 14.1707(12)                                                                       | 30.6990(13)                                                                                      | 8.4320(3)                                                                         |
| <i>α</i> (deg)                                            | 90                                                                                | 90                                                                                               | 90                                                                                |
| <i>β</i> (deg)                                            | 97.653(2)                                                                         | 92.9690                                                                                          | 104.759(3)                                                                        |
| <i>γ</i> (deg)                                            | 90                                                                                | 90                                                                                               | 90                                                                                |
| <i>Z</i> , <i>D</i> <sub>calcd</sub> (g m <sup>-3</sup> ) | 4, 1.442                                                                          | 4, 1.658                                                                                         | 4, 1.184                                                                          |
| <i>V</i> (Å <sup>3</sup> )                                | 2992.6(4)                                                                         | 3612.4(2)                                                                                        | 3644.8(2)                                                                         |
| <i>μ</i> (mm <sup>-1</sup> )                              | 0.72                                                                              | 2.308                                                                                            | 0.59                                                                              |
| <i>F</i> (000)                                            | 1344                                                                              | 1760                                                                                             | 1344                                                                              |
| <i>T</i> (K)                                              | 293(2)                                                                            | 293(2)                                                                                           | 173(2)                                                                            |
| no. of reflns collected                                   | 22496                                                                             | 27213                                                                                            | 20089                                                                             |
| no. of unique reflns.                                     | 5261 ( <i>R</i> <sub>int</sub> = 0.024)                                           | 6349 ( <i>R</i> <sub>int</sub> = 0.065)                                                          | 3327 ( <i>R</i> <sub>int</sub> = 0.032)                                           |
| no. of observed reflns                                    | 3027                                                                              | 4683                                                                                             | 2918                                                                              |
| parameters                                                | 380                                                                               | 451                                                                                              | 214                                                                               |
| R indices                                                 | <i>R</i> <sub>1</sub> = 0.0713,                                                   | <i>R</i> <sub>1</sub> = 0.0612,                                                                  | <i>R</i> <sub>1</sub> = 0.0519,                                                   |
| [ <i>I</i> > 2σ( <i>I</i> )] <sup>a,b</sup>               | <i>wR</i> <sub>2</sub> = 0.1824                                                   | <i>wR</i> <sub>2</sub> = 0.1669                                                                  | <i>wR</i> <sub>2</sub> = 0.1618                                                   |
| R indices                                                 | <i>R</i> <sub>1</sub> = 0.2570,                                                   | <i>R</i> <sub>1</sub> = 0.0864,                                                                  | <i>R</i> <sub>1</sub> = 0.0588,                                                   |
| all data                                                  | <i>wR</i> <sub>2</sub> = 0.1523                                                   | <i>wR</i> <sub>2</sub> = 0.1995                                                                  | <i>wR</i> <sub>2</sub> = 0.1685                                                   |
| GOF                                                       | 1.116                                                                             | 1.049                                                                                            | 1.065                                                                             |
| Max., min electron                                        | 0.65, -0.81                                                                       | 2.09, -1.11                                                                                      | 1.12, -0.36                                                                       |
| Density (e Å <sup>-3</sup> )                              |                                                                                   |                                                                                                  |                                                                                   |

$$^a R_1 = \sum |F_o| - |F_c| / \sum |F_o|, \quad ^b wR_2 = [\sum w(F_o^2 - F_c^2)^2] / \sum w(F_o^2)^2]^{1/2}$$

**Table S3** Selected bond lengths and bond angles of **Co-B1**, **Co-B2·CH<sub>2</sub>Cl<sub>2</sub>**, and **Co-B3**.

| <b>Co-B1</b> |          | <b>Co-B2·CH<sub>3</sub>CN</b> |          | <b>Co-B3</b>                         |          |
|--------------|----------|-------------------------------|----------|--------------------------------------|----------|
| Bond lengths |          | Bond lengths                  |          | Bond lengths                         |          |
| Co1-Cl1      | 2.224(2) | Co1-Cl1                       | 2.229(2) | Co1-Cl1                              | 2.240(1) |
| Co1-N3       | 1.952(5) | Co1-N3                        | 1.955(5) | Co1-N1                               | 1.898(2) |
| Co1-N4       | 1.892(5) | Co1-N4                        | 1.904(6) | Co1-N1 <sup>i</sup>                  | 1.898(2) |
| Co1-N5       | 1.897(5) | Co1-N5                        | 1.895(6) | Co1-N2                               | 1.896(2) |
| Co1-N6       | 1.872(5) | Co1-N6                        | 1.887(5) | Co1-N2 <sup>i</sup>                  | 1.896(2) |
| Co1-N7       | 1.871(5) | Co1-N7                        | 1.896(5) | Co1-N3                               | 1.958(3) |
| Bond angles  |          | Bond angles                   |          | Bond angles                          |          |
| N7-Co1-N6    | 81.6(2)  | N6-Co1-N5                     | 179.4(3) | N2 <sup>i</sup> -Co1-N2              | 98.8(1)  |
| N7-Co1-N4    | 178.0(2) | N6-Co1-N7                     | 81.1(2)  | N2 <sup>i</sup> -Co1-N1 <sup>i</sup> | 81.3(1)  |
| N6-Co1-N4    | 98.6(2)  | N5-Co1-N7                     | 98.6(2)  | N2-Co1-N1 <sup>i</sup>               | 178.9(1) |
| N7-Co1-N5    | 98.6(3)  | N6-Co1-N4                     | 98.8(2)  | N2 <sup>i</sup> -Co1-N1              | 178.9(1) |
| N6-Co1-N5    | 179.5(2) | N5-Co1-N4                     | 81.5(2)  | N1 <sup>i</sup> -Co1-N1              | 98.6(2)  |
| N4-Co1-N5    | 81.0(2)  | N7-Co1-N4                     | 179.4(2) | N2 <sup>i</sup> -Co1-N3              | 89.88(9) |
| N7-Co1-N3    | 88.5(2)  | N6-Co1-N3                     | 91.4(2)  | N2-Co1-N3                            | 89.88(9) |
| N6-Co1-N3    | 89.4(2)  | N5-Co1-N3                     | 89.0(2)  | N1 <sup>i</sup> -Co1-N3              | 91.26(9) |
| N4-Co1-N3    | 89.5(2)  | N7-Co1-N3                     | 90.9(2)  | N1-Co1-N3                            | 91.26(9) |
| N5-Co1-N3    | 90.2(2)  | N4-Co1-N3                     | 89.7(2)  | N2-Co1-N1                            | 81.3(1)  |
| N7-Co1-Cl1   | 90.7(2)  | N6-Co1-Cl1                    | 90.7(2)  | N2 <sup>i</sup> -Co1-Cl1             | 89.96(7) |
| N6-Co1-Cl1   | 89.5(2)  | N5-Co1-Cl1                    | 88.8(2)  | N2-Co1-Cl1                           | 89.96(7) |
| N4-Co1-Cl1   | 91.3(2)  | N7-Co1-Cl1                    | 88.7(2)  | N1 <sup>i</sup> -Co1-Cl1             | 88.90(7) |
| N5-Co1-Cl1   | 90.9(2)  | N4-Co1-Cl1                    | 90.7(2)  | N1-Co1-Cl1                           | 88.90(7) |
| N3-Co1-Cl1   | 178.7(2) | N3-Co1-Cl1                    | 177.8(2) | N3-Co1-Cl1                           | 179.8(1) |

**Table S4** The free energies for the IET reactions of **Co-B2** and **Co-B4**.

| Complex      | $\Delta G_1(\text{eV})^a$ | $\Delta G_2(\text{eV})^b$ |
|--------------|---------------------------|---------------------------|
| <b>Co-B2</b> | 0.67                      | -0.25                     |
| <b>Co-B4</b> | 0.55                      | -0.31                     |

<sup>a</sup>The free energy of the formation of Co(I) species from <sup>3</sup>BDP\* to the Co complex was calculated from the equation,  $\Delta G_1 = E(\text{BDP}^+/\text{BDP}) - E(\text{Co}^{\text{II}}/\text{Co}^{\text{I}}) - E(^3\text{BDP}^*)$ . <sup>b</sup>The free energy of the formation of Co(I) species from BDP<sup>-</sup> to the Co complex was calculated from the equation,  $\Delta G_2 = E(\text{BDP}^-/\text{BDP}) - E(\text{Co}^{\text{II}}/\text{Co}^{\text{I}})$ .

(a)

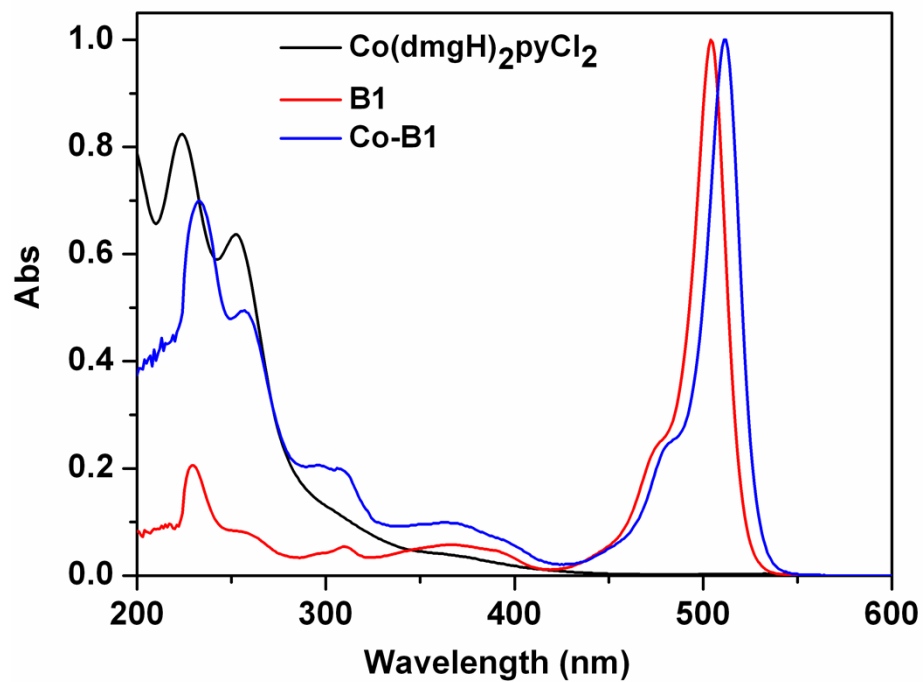

(b)

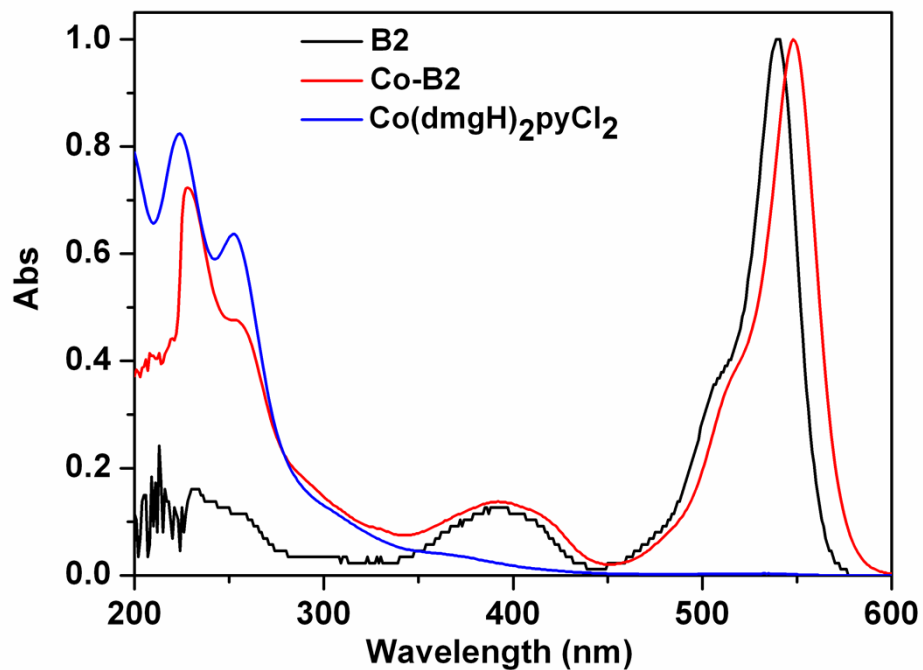

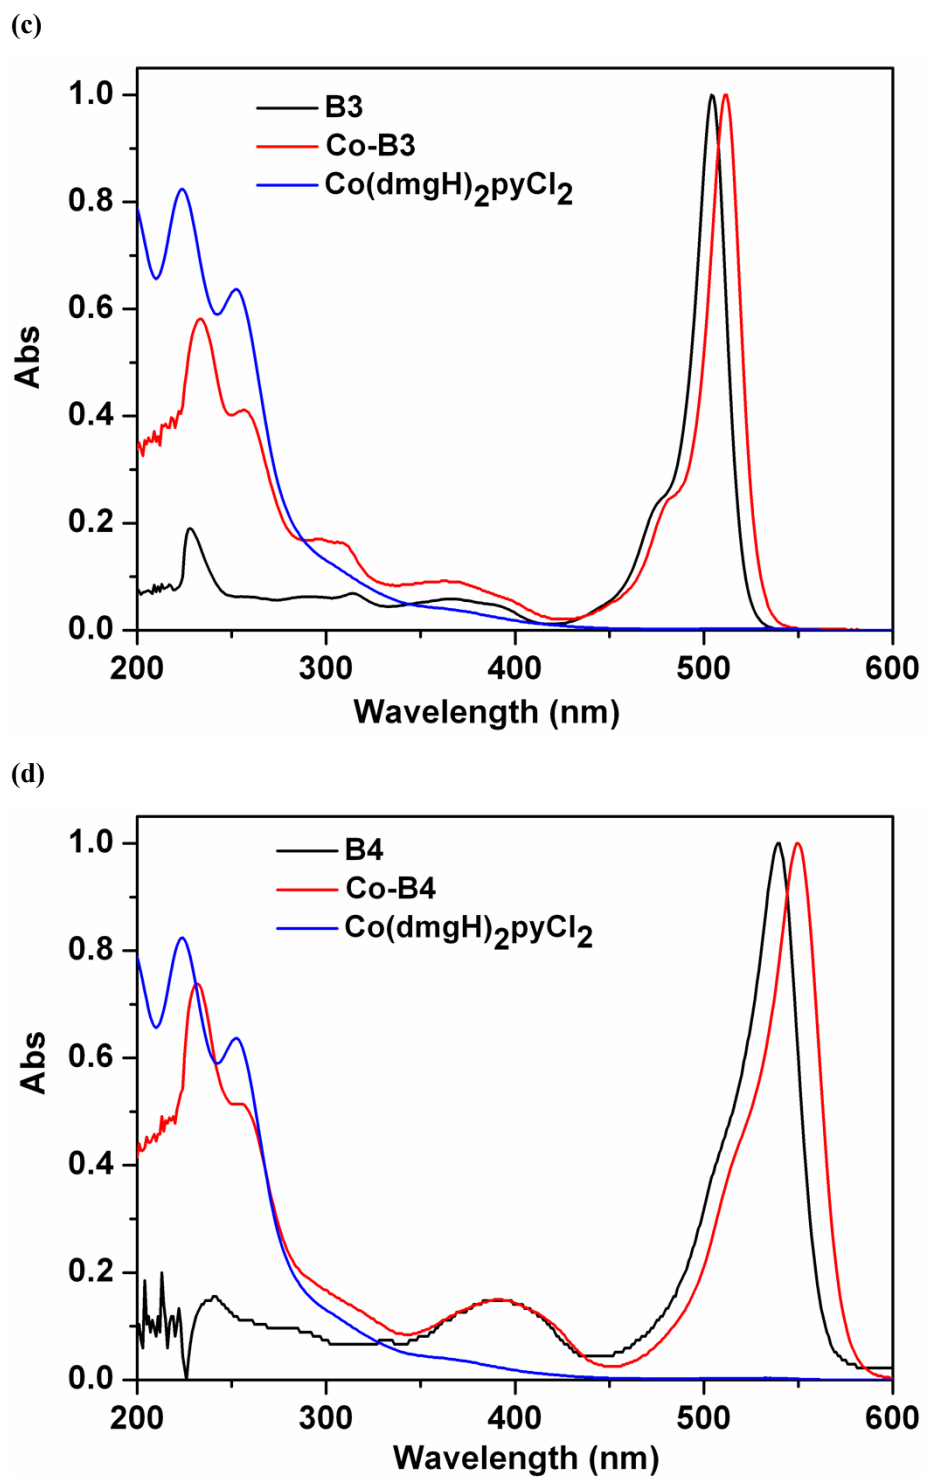

**Figure S1.** Absorption spectra of BODIPY derivatives **B<sub>n</sub>** ( $n = 1-4$ ) and BODIPY-cobaloxime complexes **Co-B<sub>n</sub>** ( $n = 1-4$ ).  $c = 1.0 \times 10^{-5}$  M in  $\text{CH}_3\text{CN}$ , at room temperature.

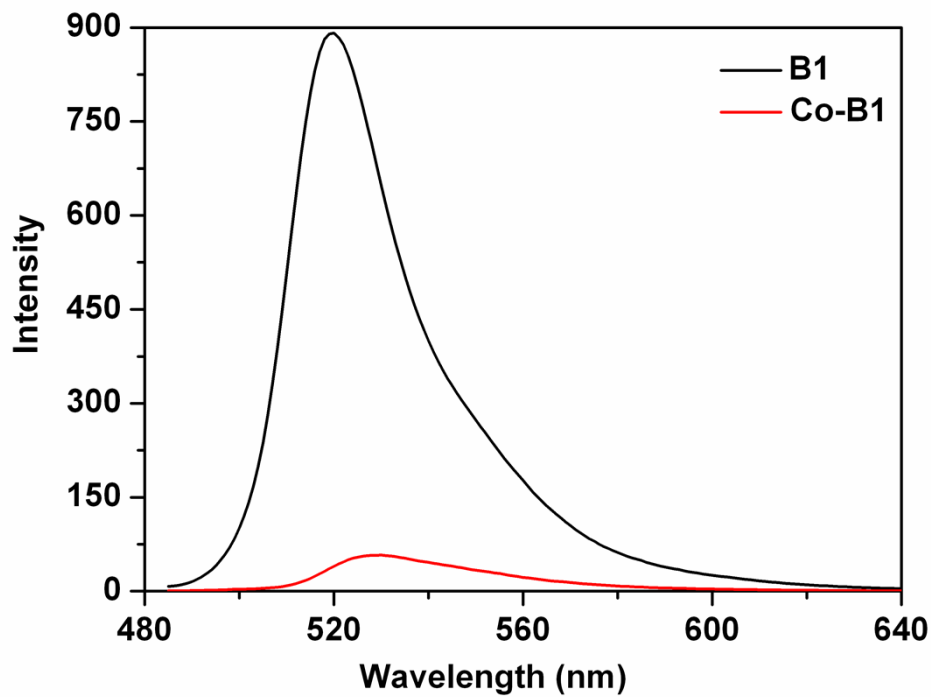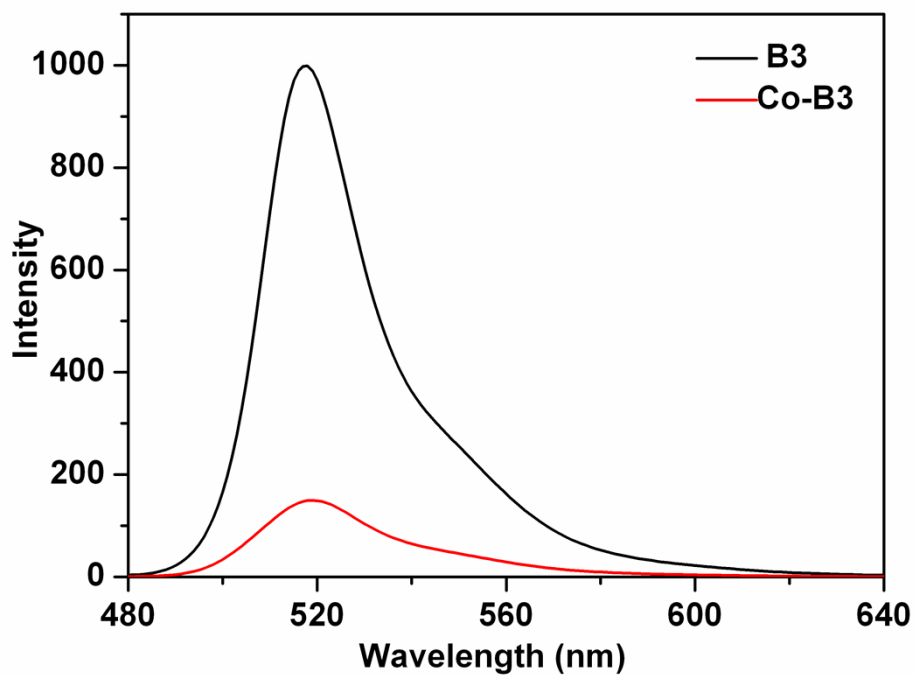

**Figure S2.** Fluorescence emission spectra of **B1** and **Co-B1** (top), and **B3** and **Co-B3** (bottom) in CH<sub>3</sub>CN.

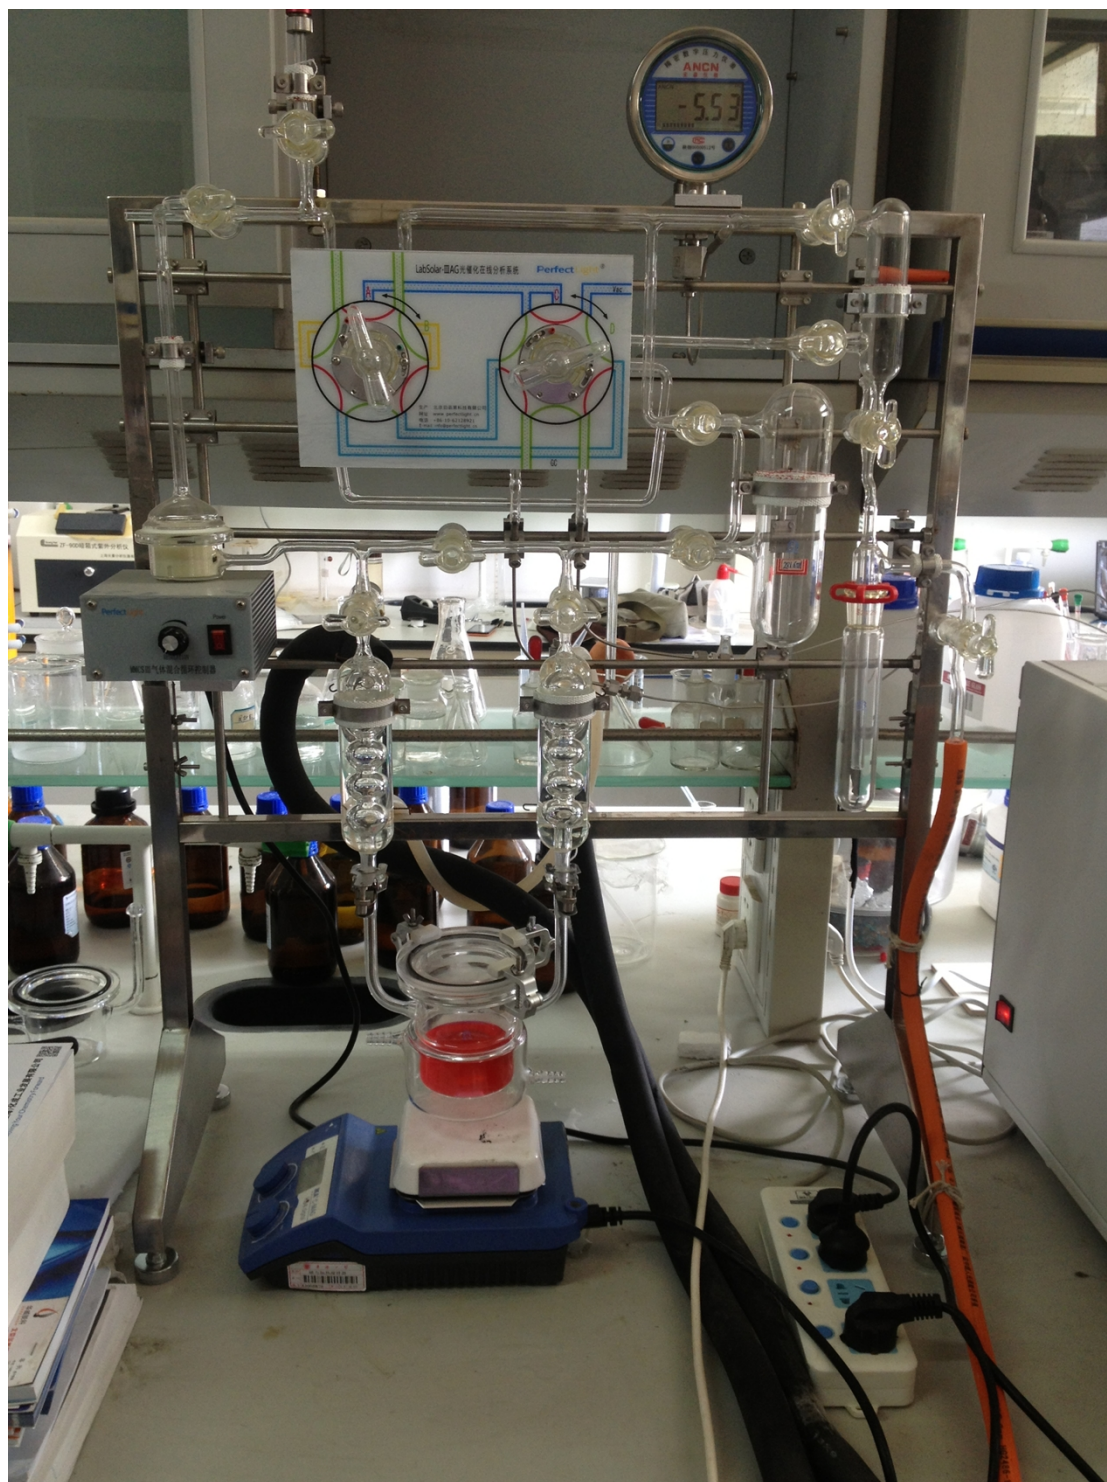

**Figure S3.** Pyrex top-irradiation reaction vessel connected to a glass closed gas circulation system.



**B1:**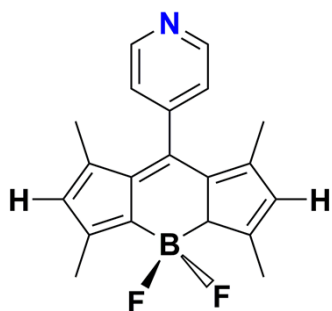**Optimized Geometry of B1**

| Center Number | Atomic Number | Atomic Type | Coordinates (Angstroms) |           |           |
|---------------|---------------|-------------|-------------------------|-----------|-----------|
|               |               |             | X                       | Y         | Z         |
| 1             | 6             | 0           | -4.215380               | 0.000270  | 1.144886  |
| 2             | 6             | 0           | -2.820364               | 0.000269  | 1.198755  |
| 3             | 6             | 0           | -2.098151               | 0.000092  | 0.000047  |
| 4             | 6             | 0           | -2.820348               | -0.000121 | -1.198672 |
| 5             | 6             | 0           | -4.215364               | -0.000121 | -1.144823 |
| 6             | 6             | 0           | -0.602907               | 0.000055  | 0.000059  |
| 7             | 6             | 0           | 0.085121                | -1.224796 | 0.000044  |
| 8             | 6             | 0           | -0.376094               | -2.583904 | -0.000044 |
| 9             | 6             | 0           | -1.776685               | -3.123775 | -0.000125 |
| 10            | 6             | 0           | 0.768882                | -3.376801 | 0.000052  |
| 11            | 6             | 0           | 1.900045                | -2.537512 | 0.000032  |
| 12            | 6             | 0           | 3.335510                | -2.953188 | 0.000043  |
| 13            | 6             | 0           | 1.900308                | 2.537373  | -0.000077 |
| 14            | 6             | 0           | 3.335820                | 2.952888  | -0.000116 |
| 15            | 6             | 0           | 0.769240                | 3.376786  | -0.000025 |
| 16            | 6             | 0           | -0.375825               | 2.584016  | -0.000091 |
| 17            | 6             | 0           | -1.776344               | 3.124073  | -0.000108 |
| 18            | 6             | 0           | 0.085237                | 1.224849  | -0.000007 |
| 19            | 7             | 0           | -4.916067               | 0.000078  | 0.000027  |
| 20            | 7             | 0           | 1.489888                | -1.247504 | -0.000027 |
| 21            | 7             | 0           | 1.490010                | 1.247410  | -0.000060 |
| 22            | 5             | 0           | 2.402023                | -0.000092 | 0.000032  |
| 23            | 9             | 0           | 3.230844                | -0.000146 | -1.147398 |
| 24            | 9             | 0           | 3.230625                | -0.000121 | 1.147632  |
| 25            | 1             | 0           | -4.795544               | 0.000408  | 2.065146  |
| 26            | 1             | 0           | -2.311480               | 0.000411  | 2.158112  |
| 27            | 1             | 0           | -2.311450               | -0.000291 | -2.158021 |
| 28            | 1             | 0           | -4.795516               | -0.000279 | -2.065091 |
| 29            | 1             | 0           | -1.746720               | -4.217643 | -0.000091 |
| 30            | 1             | 0           | -2.342954               | -2.801606 | -0.880540 |

Electronic Supplementary Information for *PCCP*

|    |   |   |           |           |           |
|----|---|---|-----------|-----------|-----------|
| 31 | 1 | 0 | -2.343073 | -2.801553 | 0.880190  |
| 32 | 1 | 0 | 0.798468  | -4.459360 | 0.000083  |
| 33 | 1 | 0 | 3.860657  | -2.569010 | 0.881707  |
| 34 | 1 | 0 | 3.860516  | -2.569479 | -0.881913 |
| 35 | 1 | 0 | 3.405653  | -4.043919 | 0.000322  |
| 36 | 1 | 0 | 3.860953  | 2.568659  | 0.881533  |
| 37 | 1 | 0 | 3.406086  | 4.043611  | 0.000149  |
| 38 | 1 | 0 | 3.860753  | 2.569111  | -0.882086 |
| 39 | 1 | 0 | 0.798947  | 4.459342  | -0.000002 |
| 40 | 1 | 0 | -1.746231 | 4.217937  | -0.000169 |
| 41 | 1 | 0 | -2.342699 | 2.802007  | 0.880288  |
| 42 | 1 | 0 | -2.342732 | 2.801906  | -0.880442 |

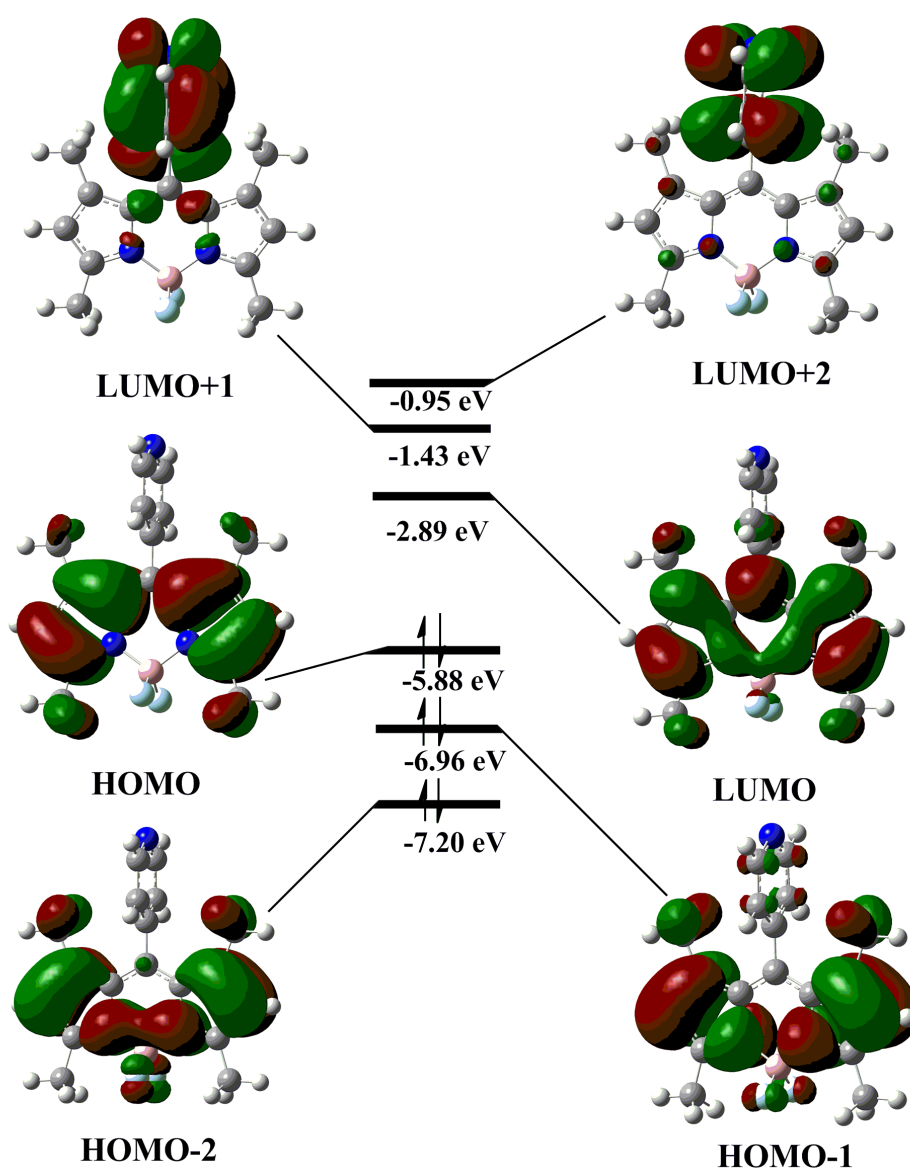

Excitation Energies and Oscillator Strengths:

HOMO = 85

Electronic Supplementary Information for *PCCP*

LUMO = 86

Triplets calculated separately

|                   |           |           |           |          |              |
|-------------------|-----------|-----------|-----------|----------|--------------|
| Excited State 1:  | Triplet-A | 1.5121 eV | 819.96 nm | f=0.0000 | <S**2>=2.000 |
| 85 -> 86          | 0.71036   |           |           |          |              |
| 85 <- 86          | 0.11789   |           |           |          |              |
| Excited State 2:  | Triplet-A | 2.7212 eV | 455.62 nm | f=0.0000 | <S**2>=2.000 |
| 84 -> 86          | 0.69184   |           |           |          |              |
| Excited State 1:  | Singlet-A | 2.8665 eV | 432.53 nm | f=0.5844 | <S**2>=0.000 |
| 84 -> 86          | 0.12872   |           |           |          |              |
| 85 -> 86          | 0.69836   |           |           |          |              |
| 85 <- 86          | -0.10516  |           |           |          |              |
| Excited State 2:  | Singlet-A | 3.3962 eV | 365.07 nm | f=0.0727 | <S**2>=0.000 |
| 84 -> 86          | 0.69320   |           |           |          |              |
| 85 -> 86          | -0.13163  |           |           |          |              |
| Excited State 3:  | Singlet-A | 3.6573 eV | 339.01 nm | f=0.0490 | <S**2>=0.000 |
| 83 -> 86          | 0.70389   |           |           |          |              |
| Excited State 4:  | Singlet-A | 3.7786 eV | 328.12 nm | f=0.0000 | <S**2>=0.000 |
| 85 -> 87          | 0.70594   |           |           |          |              |
| Excited State 5:  | Singlet-A | 4.0542 eV | 305.82 nm | f=0.0021 | <S**2>=0.000 |
| 81 -> 86          | 0.70640   |           |           |          |              |
| Excited State 6:  | Singlet-A | 4.1492 eV | 298.82 nm | f=0.0000 | <S**2>=0.000 |
| 82 -> 86          | 0.70618   |           |           |          |              |
| Excited State 7:  | Singlet-A | 4.3180 eV | 287.14 nm | f=0.0090 | <S**2>=0.000 |
| 85 -> 88          | 0.70182   |           |           |          |              |
| Excited State 8:  | Singlet-A | 4.4340 eV | 279.62 nm | f=0.0000 | <S**2>=0.000 |
| 79 -> 86          | 0.70502   |           |           |          |              |
| Excited State 9:  | Singlet-A | 4.8869 eV | 253.71 nm | f=0.0056 | <S**2>=0.000 |
| 82 -> 87          | 0.70474   |           |           |          |              |
| Excited State 10: | Singlet-A | 4.8888 eV | 253.61 nm | f=0.0020 | <S**2>=0.000 |
| 84 -> 87          | 0.70424   |           |           |          |              |

**B2:**

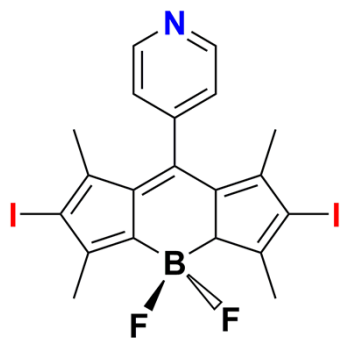

**Optimized Geometry of B2**

---

Electronic Supplementary Information for *PCCP*

| Center<br>Number | Atomic<br>Number | Atomic<br>Type | Coordinates (Angstroms) |           |           |
|------------------|------------------|----------------|-------------------------|-----------|-----------|
|                  |                  |                | X                       | Y         | Z         |
| 1                | 6                | 0              | 0.000061                | 4.545024  | 1.145624  |
| 2                | 6                | 0              | 0.000056                | 3.149703  | 1.199756  |
| 3                | 6                | 0              | 0.000012                | 2.428755  | 0.000225  |
| 4                | 6                | 0              | -0.000007               | 3.149750  | -1.199270 |
| 5                | 6                | 0              | 0.000024                | 4.545071  | -1.145077 |
| 6                | 6                | 0              | 0.000000                | 0.933711  | 0.000227  |
| 7                | 6                | 0              | -1.226373               | 0.246091  | 0.000148  |
| 8                | 6                | 0              | -2.582529               | 0.716044  | -0.000010 |
| 9                | 6                | 0              | -3.087034               | 2.126733  | -0.000086 |
| 10               | 6                | 0              | -3.365869               | -0.434861 | -0.000075 |
| 11               | 53               | 0              | -5.476433               | -0.545485 | -0.000320 |
| 12               | 6                | 0              | -2.532377               | -1.574108 | 0.000005  |
| 13               | 6                | 0              | -2.952389               | -3.006183 | 0.000016  |
| 14               | 6                | 0              | 2.532363                | -1.574120 | 0.000413  |
| 15               | 6                | 0              | 2.952367                | -3.006199 | 0.000384  |
| 16               | 6                | 0              | 3.365859                | -0.434876 | 0.000135  |
| 17               | 53               | 0              | 5.476423                | -0.545505 | -0.000374 |
| 18               | 6                | 0              | 2.582523                | 0.716032  | 0.000026  |
| 19               | 6                | 0              | 3.087025                | 2.126721  | -0.000248 |
| 20               | 6                | 0              | 1.226367                | 0.246082  | 0.000276  |
| 21               | 7                | 0              | 0.000051                | 5.244981  | 0.000286  |
| 22               | 7                | 0              | -1.249117               | -1.156623 | 0.000111  |
| 23               | 7                | 0              | 1.249104                | -1.156631 | 0.000394  |
| 24               | 5                | 0              | -0.000009               | -2.070318 | 0.000502  |
| 25               | 9                | 0              | 0.000172                | -2.890260 | -1.148720 |
| 26               | 9                | 0              | -0.000195               | -2.889622 | 1.150209  |
| 27               | 1                | 0              | 0.000084                | 5.125387  | 2.065681  |
| 28               | 1                | 0              | 0.000074                | 2.640676  | 2.159005  |
| 29               | 1                | 0              | -0.000033               | 2.640769  | -2.158543 |
| 30               | 1                | 0              | 0.000019                | 5.125472  | -2.065111 |
| 31               | 1                | 0              | -4.179737               | 2.134182  | 0.000456  |
| 32               | 1                | 0              | -2.747900               | 2.680257  | -0.881482 |
| 33               | 1                | 0              | -2.747002               | 2.680719  | 0.880657  |
| 34               | 1                | 0              | -2.100815               | -3.684962 | 0.000309  |
| 35               | 1                | 0              | -3.569623               | -3.219558 | -0.881337 |
| 36               | 1                | 0              | -3.570120               | -3.219396 | 0.881056  |
| 37               | 1                | 0              | 2.100795                | -3.684970 | 0.004105  |
| 38               | 1                | 0              | 3.573023                | -3.218574 | 0.879542  |
| 39               | 1                | 0              | 3.566666                | -3.220421 | -0.882839 |
| 40               | 1                | 0              | 4.179728                | 2.134174  | -0.000158 |
| 41               | 1                | 0              | 2.747361                | 2.680682  | 0.880655  |

42            1            0            2.747519    2.680269    -0.881483

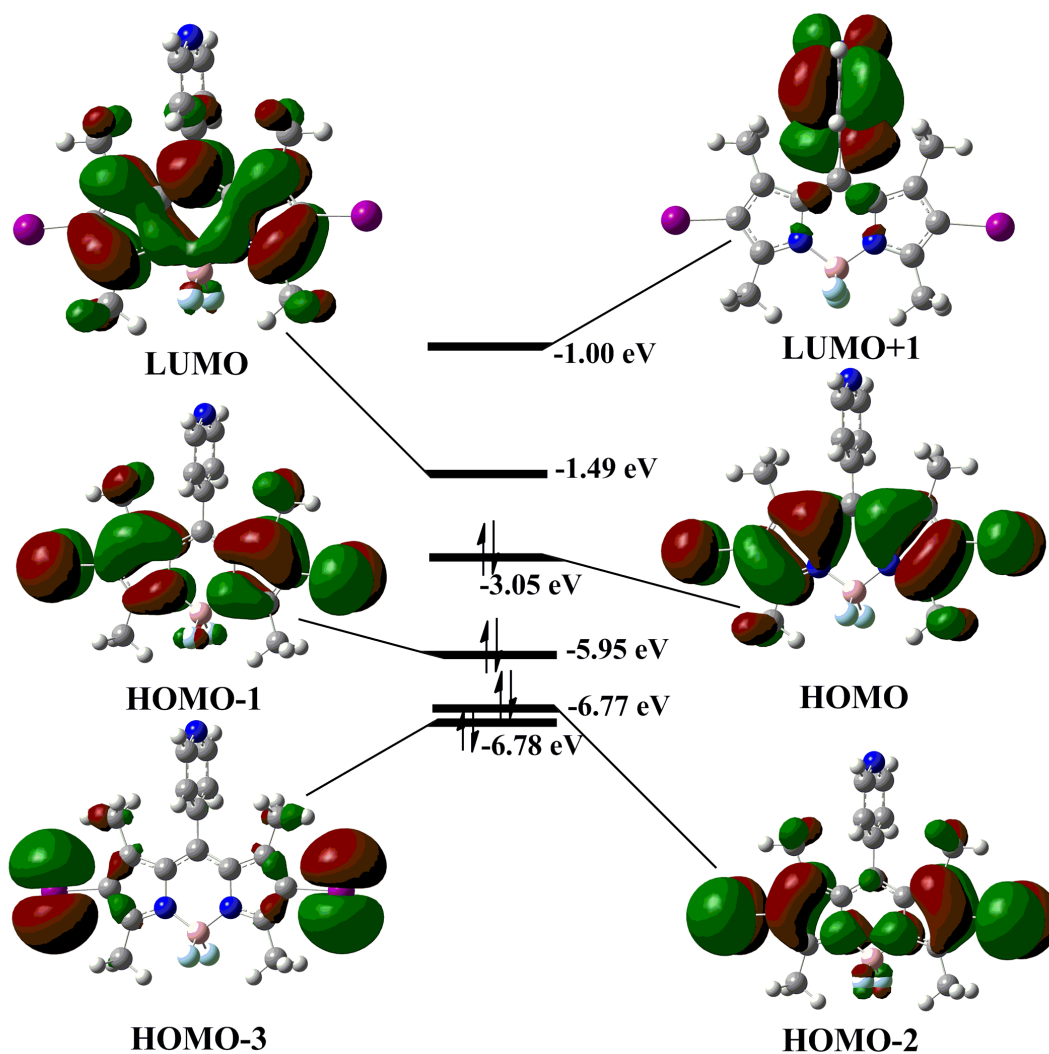**Excitation Energies and Oscillator Strengths:**

HOMO = 137

LUMO = 138

Triplets calculated separately

|               |           |           |           |           |          |              |
|---------------|-----------|-----------|-----------|-----------|----------|--------------|
| Excited State | 1:        | Triplet-A | 1.5135 eV | 819.19 nm | f=0.0000 | <S**2>=2.000 |
|               | 136 ->138 | -0.16847  |           |           |          |              |
|               | 137 ->138 | 0.69352   |           |           |          |              |
|               | 137 <-138 | 0.10477   |           |           |          |              |
| Excited State | 2:        | Triplet-A | 2.4937 eV | 497.19 nm | f=0.0000 | <S**2>=2.000 |
|               | 128 ->138 | 0.12645   |           |           |          |              |
|               | 136 ->138 | 0.66932   |           |           |          |              |
|               | 137 ->138 | 0.15992   |           |           |          |              |
| Excited State | 3:        | Triplet-A | 2.6454 eV | 468.68 nm | f=0.0000 | <S**2>=2.000 |
|               | 130 ->138 | -0.11442  |           |           |          |              |
|               | 135 ->138 | 0.68230   |           |           |          |              |

Electronic Supplementary Information for *PCCP*

|                   |           |           |           |          |              |
|-------------------|-----------|-----------|-----------|----------|--------------|
| Excited State 1:  | Singlet-A | 2.6570 eV | 466.63 nm | f=0.5505 | <S**2>=0.000 |
| 136 ->138         | 0.21358   |           |           |          |              |
| 137 ->138         | 0.67552   |           |           |          |              |
| Excited State 2:  | Singlet-A | 3.1910 eV | 388.54 nm | f=0.0527 | <S**2>=0.000 |
| 135 ->138         | 0.70260   |           |           |          |              |
| Excited State 3:  | Singlet-A | 3.2292 eV | 383.94 nm | f=0.3204 | <S**2>=0.000 |
| 136 ->138         | 0.67141   |           |           |          |              |
| 137 ->138         | -0.21717  |           |           |          |              |
| Excited State 4:  | Singlet-A | 3.7906 eV | 327.09 nm | f=0.0000 | <S**2>=0.000 |
| 134 ->138         | 0.70607   |           |           |          |              |
| Excited State 5:  | Singlet-A | 3.8192 eV | 324.64 nm | f=0.0000 | <S**2>=0.000 |
| 133 ->138         | 0.69736   |           |           |          |              |
| 137 ->139         | 0.11148   |           |           |          |              |
| Excited State 6:  | Singlet-A | 3.8248 eV | 324.16 nm | f=0.0000 | <S**2>=0.000 |
| 133 ->138         | -0.11197  |           |           |          |              |
| 137 ->139         | 0.69421   |           |           |          |              |
| Excited State 7:  | Singlet-A | 3.9236 eV | 316.00 nm | f=0.0043 | <S**2>=0.000 |
| 131 ->138         | 0.70575   |           |           |          |              |
| Excited State 8:  | Singlet-A | 4.0022 eV | 309.79 nm | f=0.0001 | <S**2>=0.000 |
| 132 ->138         | 0.70624   |           |           |          |              |
| Excited State 9:  | Singlet-A | 4.0194 eV | 308.46 nm | f=0.0000 | <S**2>=0.000 |
| 135 ->142         | 0.12800   |           |           |          |              |
| 137 ->141         | 0.69047   |           |           |          |              |
| Excited State 10: | Singlet-A | 4.2698 eV | 290.37 nm | f=0.0000 | <S**2>=0.000 |
| 129 ->138         | 0.70362   |           |           |          |              |

**B3:**

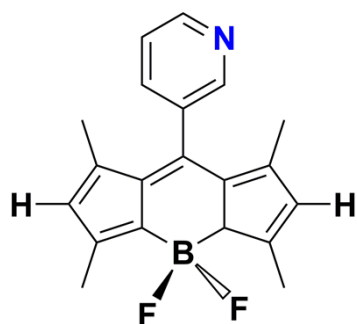

**Optimized Geometry of B3**

| Center Number | Atomic Number | Atomic Type | Coordinates (Angstroms) |           |           |
|---------------|---------------|-------------|-------------------------|-----------|-----------|
|               |               |             | X                       | Y         | Z         |
| 1             | 5             | 0           | 2.399729                | 0.000001  | 0.004737  |
| 2             | 7             | 0           | 1.487762                | 1.247573  | 0.001422  |
| 3             | 7             | 0           | 1.487764                | -1.247573 | 0.001446  |
| 4             | 7             | 0           | -4.159598               | 0.000173  | -1.250767 |

Electronic Supplementary Information for *PCCP*

|    |   |   |           |           |           |
|----|---|---|-----------|-----------|-----------|
| 5  | 9 | 0 | 3.232879  | -0.000009 | -1.139488 |
| 6  | 9 | 0 | 3.224427  | 0.000013  | 1.155531  |
| 7  | 6 | 0 | 1.897558  | 2.537845  | -0.002062 |
| 8  | 6 | 0 | 0.766040  | 3.376654  | -0.002519 |
| 9  | 6 | 0 | -0.378580 | 2.583036  | 0.001454  |
| 10 | 6 | 0 | 0.083104  | 1.224274  | 0.004400  |
| 11 | 6 | 0 | 3.332942  | 2.953914  | -0.005183 |
| 12 | 6 | 0 | -1.779695 | 3.121991  | 0.001264  |
| 13 | 6 | 0 | -0.606653 | -0.000002 | 0.008506  |
| 14 | 6 | 0 | 0.083107  | -1.224275 | 0.004395  |
| 15 | 6 | 0 | -0.378576 | -2.583036 | 0.001381  |
| 16 | 6 | 0 | 0.766044  | -3.376653 | -0.002603 |
| 17 | 6 | 0 | 1.897561  | -2.537844 | -0.002057 |
| 18 | 6 | 0 | 3.332946  | -2.953912 | -0.005157 |
| 19 | 6 | 0 | -1.779692 | -3.121990 | 0.001116  |
| 20 | 6 | 0 | -2.100049 | -0.000004 | 0.017485  |
| 21 | 6 | 0 | -2.821259 | 0.000166  | -1.185104 |
| 22 | 6 | 0 | -4.839633 | 0.000013  | -0.093329 |
| 23 | 6 | 0 | -4.219773 | -0.000164 | 1.158142  |
| 24 | 6 | 0 | -2.826539 | -0.000178 | 1.213858  |
| 25 | 1 | 0 | 0.795238  | 4.459240  | -0.005771 |
| 26 | 1 | 0 | 3.861201  | 2.566967  | 0.873398  |
| 27 | 1 | 0 | 3.402857  | 4.044665  | -0.001625 |
| 28 | 1 | 0 | 3.855131  | 2.573335  | -0.890200 |
| 29 | 1 | 0 | -1.750489 | 4.215947  | -0.003662 |
| 30 | 1 | 0 | -2.345076 | 2.803821  | 0.883656  |
| 31 | 1 | 0 | -2.347574 | 2.796522  | -0.877146 |
| 32 | 1 | 0 | 0.795243  | -4.459240 | -0.005913 |
| 33 | 1 | 0 | 3.861204  | -2.566931 | 0.873410  |
| 34 | 1 | 0 | 3.855136  | -2.573367 | -0.890188 |
| 35 | 1 | 0 | 3.402862  | -4.044663 | -0.001560 |
| 36 | 1 | 0 | -1.750488 | -4.215944 | -0.004202 |
| 37 | 1 | 0 | -2.347656 | -2.796200 | -0.877117 |
| 38 | 1 | 0 | -2.344987 | -2.804140 | 0.883681  |
| 39 | 1 | 0 | -2.291848 | 0.000297  | -2.135916 |
| 40 | 1 | 0 | -5.924476 | 0.000028  | -0.172771 |
| 41 | 1 | 0 | -4.815799 | -0.000289 | 2.065592  |
| 42 | 1 | 0 | -2.309486 | -0.000315 | 2.169616  |

---

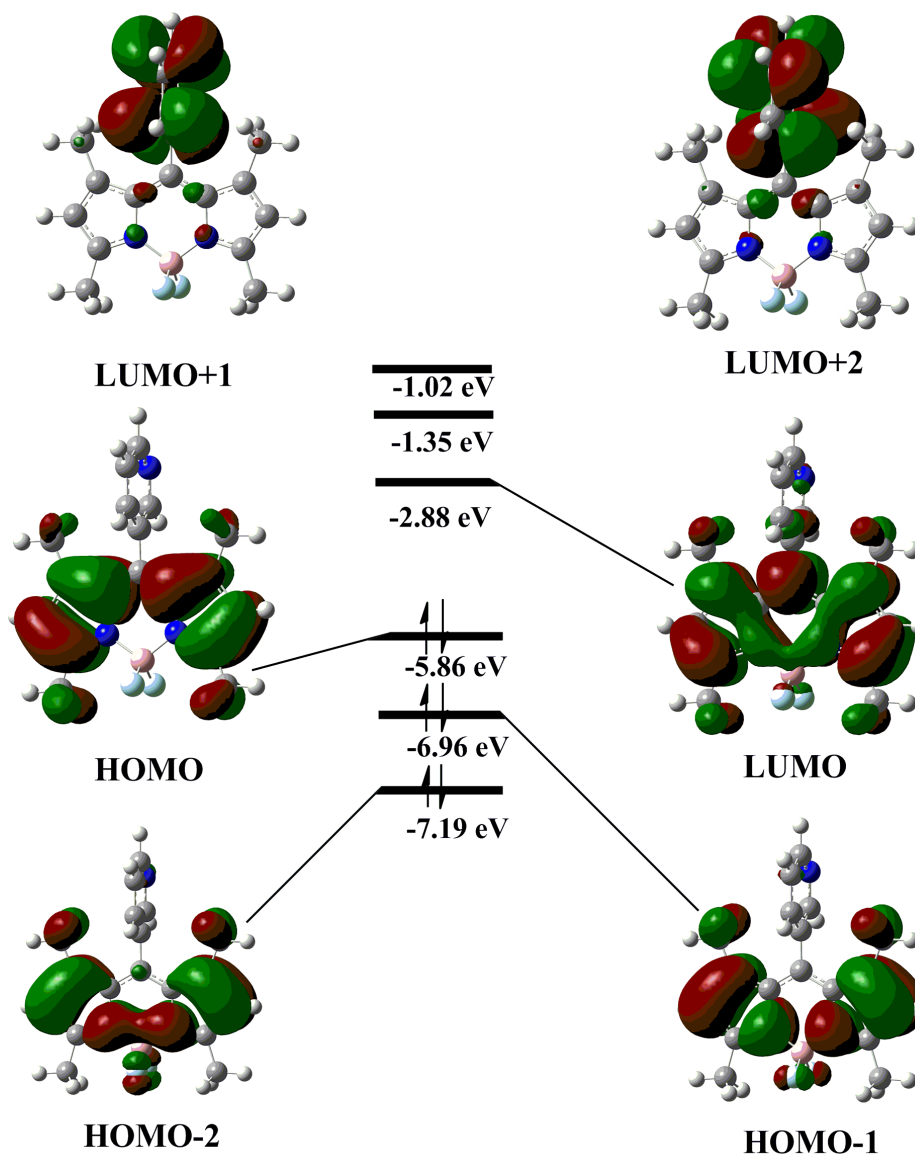

**Excitation Energies and Oscillator Strengths:**

HOMO = 85

LUMO = 86

Triplets calculated separately

|               |          |           |           |           |          |              |
|---------------|----------|-----------|-----------|-----------|----------|--------------|
| Excited State | 1:       | Triplet-A | 1.5098 eV | 821.17 nm | f=0.0000 | <S**2>=2.000 |
|               | 85 -> 86 | 0.71043   |           |           |          |              |
|               | 85 <- 86 | 0.11801   |           |           |          |              |
| Excited State | 2:       | Triplet-A | 2.7254 eV | 454.93 nm | f=0.0000 | <S**2>=2.000 |
|               | 84 -> 86 | 0.69331   |           |           |          |              |
| Excited State | 1:       | Singlet-A | 2.8635 eV | 432.98 nm | f=0.5841 | <S**2>=0.000 |
|               | 84 -> 86 | 0.12893   |           |           |          |              |
|               | 85 -> 86 | 0.69850   |           |           |          |              |
|               | 85 <- 86 | -0.10524  |           |           |          |              |
| Excited State | 2:       | Singlet-A | 3.4033 eV | 364.30 nm | f=0.0732 | <S**2>=0.000 |



Electronic Supplementary Information for *PCCP*

|                   |           |           |           |          |              |  |  |
|-------------------|-----------|-----------|-----------|----------|--------------|--|--|
|                   | 84 -> 86  | 0.69311   |           |          |              |  |  |
|                   | 85 -> 86  | -0.13192  |           |          |              |  |  |
| Excited State 3:  | Singlet-A | 3.6558 eV | 339.14 nm | f=0.0417 | <S**2>=0.000 |  |  |
|                   | 83 -> 86  | 0.70400   |           |          |              |  |  |
|                   | 81 -> 87  | -0.10368  |           |          |              |  |  |
|                   | 81 -> 88  | 0.51379   |           |          |              |  |  |
|                   | 85 -> 87  | -0.27035  |           |          |              |  |  |
| Excited State 4:  | Singlet-A | 3.8866 eV | 319.01 nm | f=0.0046 | <S**2>=0.000 |  |  |
|                   | 85 -> 87  | 0.70154   |           |          |              |  |  |
| Excited State 5:  | Singlet-A | 3.8945 eV | 318.36 nm | f=0.0003 | <S**2>=0.000 |  |  |
|                   | 81 -> 86  | 0.70208   |           |          |              |  |  |
| Excited State 6:  | Singlet-A | 4.0765 eV | 304.14 nm | f=0.0772 | <S**2>=0.000 |  |  |
|                   | 82 -> 86  | 0.69263   |           |          |              |  |  |
| Excited State 7:  | Singlet-A | 4.1948 eV | 295.57 nm | f=0.0092 | <S**2>=0.000 |  |  |
|                   | 85 -> 88  | 0.70031   |           |          |              |  |  |
| Excited State 8:  | Singlet-A | 4.6509 eV | 266.58 nm | f=0.0008 | <S**2>=0.000 |  |  |
|                   | 79 -> 86  | 0.70218   |           |          |              |  |  |
| Excited State 9:  | Singlet-A | 4.9146 eV | 252.28 nm | f=0.0036 | <S**2>=0.000 |  |  |
|                   | 80 -> 87  | 0.11811   |           |          |              |  |  |
|                   | 82 -> 87  | 0.68128   |           |          |              |  |  |
|                   | 83 -> 87  | 0.13547   |           |          |              |  |  |
| Excited State 10: | Singlet-A | 4.9323 eV | 251.37 nm | f=0.2064 | <S**2>=0.000 |  |  |
|                   | 80 -> 86  | 0.66149   |           |          |              |  |  |
|                   | 85 -> 93  | -0.20776  |           |          |              |  |  |

4.

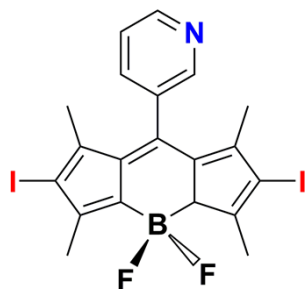

Optimized Geometry of B3

| Center Number | Atomic Number | Atomic Type | Coordinates (Angstroms) |           |           |
|---------------|---------------|-------------|-------------------------|-----------|-----------|
|               |               |             | X                       | Y         | Z         |
| 1             | 5             | 0           | -0.000023               | -2.069769 | 0.002486  |
| 2             | 7             | 0           | 1.249248                | -1.156152 | 0.002027  |
| 3             | 7             | 0           | -1.249282               | -1.156134 | 0.002061  |
| 4             | 7             | 0           | 0.000247                | 4.487005  | -1.251294 |
| 5             | 9             | 0           | -0.000044               | -2.890133 | -1.146447 |
| 6             | 9             | 0           | -0.000014               | -2.888972 | 1.152493  |
| 7             | 6             | 0           | 2.532809                | -1.573144 | 0.001150  |

Electronic Supplementary Information for *PCCP*

|    |    |   |           |           |           |
|----|----|---|-----------|-----------|-----------|
| 8  | 6  | 0 | 3.365619  | -0.433394 | 0.001610  |
| 9  | 53 | 0 | 5.476399  | -0.542801 | -0.001309 |
| 10 | 6  | 0 | 2.581502  | 0.717087  | 0.003553  |
| 11 | 6  | 0 | 1.225819  | 0.246394  | 0.004437  |
| 12 | 6  | 0 | 2.953454  | -3.005078 | -0.000965 |
| 13 | 6  | 0 | 3.084972  | 2.128373  | 0.004045  |
| 14 | 6  | 0 | -0.000001 | 0.935700  | 0.008164  |
| 15 | 6  | 0 | -1.225838 | 0.246414  | 0.004440  |
| 16 | 6  | 0 | -2.581521 | 0.717116  | 0.003519  |
| 17 | 6  | 0 | -3.365645 | -0.433359 | 0.001604  |
| 18 | 53 | 0 | -5.476426 | -0.542746 | -0.001321 |
| 19 | 6  | 0 | -2.532846 | -1.573115 | 0.001178  |
| 20 | 6  | 0 | -2.953503 | -3.005045 | -0.000921 |
| 21 | 6  | 0 | -3.084998 | 2.128400  | 0.003939  |
| 22 | 6  | 0 | 0.000031  | 2.428622  | 0.016890  |
| 23 | 6  | 0 | 0.000200  | 3.148731  | -1.186499 |
| 24 | 6  | 0 | 0.000141  | 5.167363  | -0.094014 |
| 25 | 6  | 0 | -0.000015 | 4.547536  | 1.157997  |
| 26 | 6  | 0 | -0.000075 | 3.154264  | 1.214048  |
| 27 | 1  | 0 | 2.102051  | -3.684092 | 0.001999  |
| 28 | 1  | 0 | 3.574407  | -3.218584 | 0.877726  |
| 29 | 1  | 0 | 3.567578  | -3.217903 | -0.884650 |
| 30 | 1  | 0 | 4.177744  | 2.136671  | -0.000328 |
| 31 | 1  | 0 | 2.749074  | 2.680942  | 0.887229  |
| 32 | 1  | 0 | 2.742421  | 2.684027  | -0.874921 |
| 33 | 1  | 0 | -2.102104 | -3.684065 | 0.001936  |
| 34 | 1  | 0 | -3.567725 | -3.217845 | -0.884542 |
| 35 | 1  | 0 | -3.574361 | -3.218566 | 0.877834  |
| 36 | 1  | 0 | -4.177768 | 2.136690  | -0.000968 |
| 37 | 1  | 0 | -2.742012 | 2.684184  | -0.874768 |
| 38 | 1  | 0 | -2.749548 | 2.680842  | 0.887378  |
| 39 | 1  | 0 | 0.000290  | 2.619366  | -2.137319 |
| 40 | 1  | 0 | 0.000191  | 6.252123  | -0.173708 |
| 41 | 1  | 0 | -0.000090 | 5.143619  | 2.065310  |
| 42 | 1  | 0 | -0.000193 | 2.637116  | 2.169707  |

---

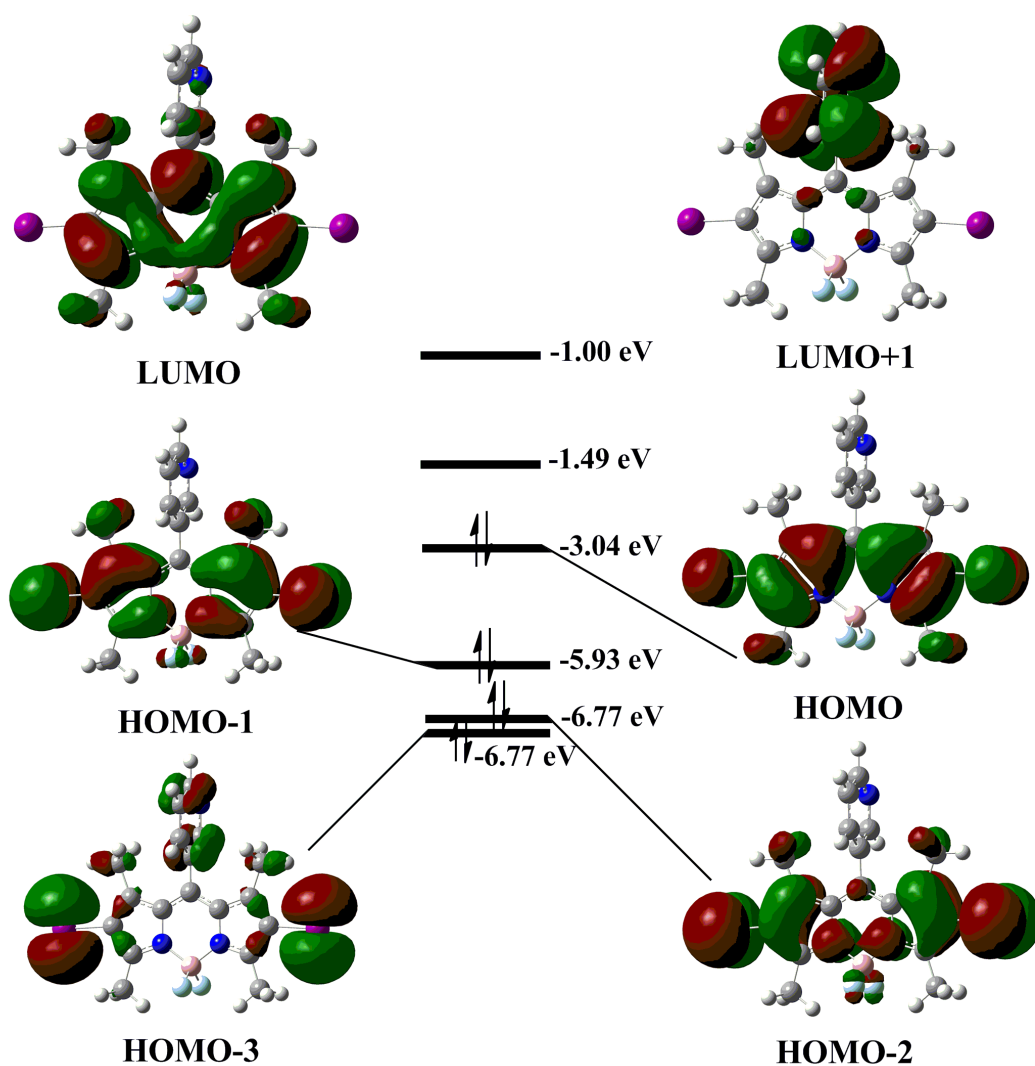**Excitation Energies and Oscillator Strengths:**

HOMO = 137

LUMO = 138

Triplets calculated separately

|               |           |           |           |           |          |              |
|---------------|-----------|-----------|-----------|-----------|----------|--------------|
| Excited State | 1:        | Triplet-A | 1.5118 eV | 820.09 nm | f=0.0000 | <S**2>=2.000 |
|               | 136 ->138 | 0.16725   |           |           |          |              |
|               | 137 ->138 | 0.69387   |           |           |          |              |
|               | 137 <-138 | 0.10487   |           |           |          |              |
| Excited State | 2:        | Triplet-A | 2.4982 eV | 496.29 nm | f=0.0000 | <S**2>=2.000 |
|               | 136 ->138 | 0.66966   |           |           |          |              |
|               | 137 ->138 | -0.15866  |           |           |          |              |
| Excited State | 3:        | Triplet-A | 2.6490 eV | 468.05 nm | f=0.0000 | <S**2>=2.000 |
|               | 130 ->138 | -0.11086  |           |           |          |              |
|               | 135 ->138 | 0.68190   |           |           |          |              |
| Excited State | 1:        | Singlet-A | 2.6569 eV | 466.65 nm | f=0.5538 | <S**2>=0.000 |
|               | 136 ->138 | -0.21219  |           |           |          |              |
|               | 137 ->138 | 0.67602   |           |           |          |              |

Electronic Supplementary Information for *PCCP*

|                  |           |           |           |          |                                  |
|------------------|-----------|-----------|-----------|----------|----------------------------------|
| Excited State 2: | Singlet-A | 3.1937 eV | 388.22 nm | f=0.0536 | $\langle S^{*2} \rangle = 0.000$ |
| 135 ->138        | 0.70231   |           |           |          |                                  |
| Excited State 3: | Singlet-A | 3.2339 eV | 383.39 nm | f=0.3185 | $\langle S^{*2} \rangle = 0.000$ |
| 136 ->138        | 0.67217   |           |           |          |                                  |
| 137 ->138        | 0.21621   |           |           |          |                                  |
| Excited State 4: | Singlet-A | 3.7419 eV | 331.34 nm | f=0.0004 | $\langle S^{*2} \rangle = 0.000$ |
| 131 ->138        | -0.38481  |           |           |          |                                  |
| 134 ->138        | 0.58937   |           |           |          |                                  |
| Excited State 5: | Singlet-A | 3.8254 eV | 324.11 nm | f=0.0000 | $\langle S^{*2} \rangle = 0.000$ |
| 133 ->138        | 0.70628   |           |           |          |                                  |
| Excited State 6: | Singlet-A | 3.8418 eV | 322.72 nm | f=0.0003 | $\langle S^{*2} \rangle = 0.000$ |
| 131 ->138        | 0.58674   |           |           |          |                                  |
| 134 ->138        | 0.38865   |           |           |          |                                  |
| Excited State 7: | Singlet-A | 3.9271 eV | 315.71 nm | f=0.0059 | $\langle S^{*2} \rangle = 0.000$ |
| 132 ->138        | 0.47605   |           |           |          |                                  |
| 137 ->139        | 0.51909   |           |           |          |                                  |
| Excited State 8: | Singlet-A | 3.9596 eV | 313.13 nm | f=0.0495 | $\langle S^{*2} \rangle = 0.000$ |
| 132 ->138        | 0.51581   |           |           |          |                                  |
| 137 ->139        | -0.47331  |           |           |          |                                  |
| Excited State 9: | Singlet-A | 3.9940 eV | 310.43 nm | f=0.0052 | $\langle S^{*2} \rangle = 0.000$ |
| 137 ->140        | 0.70011   |           |           |          |                                  |
| Excited State 0: | Singlet-A | 4.0252 eV | 308.02 nm | f=0.0000 | $\langle S^{*2} \rangle = 0.000$ |
| 135 ->142        | 0.12724   |           |           |          |                                  |
| 137 ->141        | 0.69209   |           |           |          |                                  |

Electronic Supplementary Information for *PCCP*

(a)

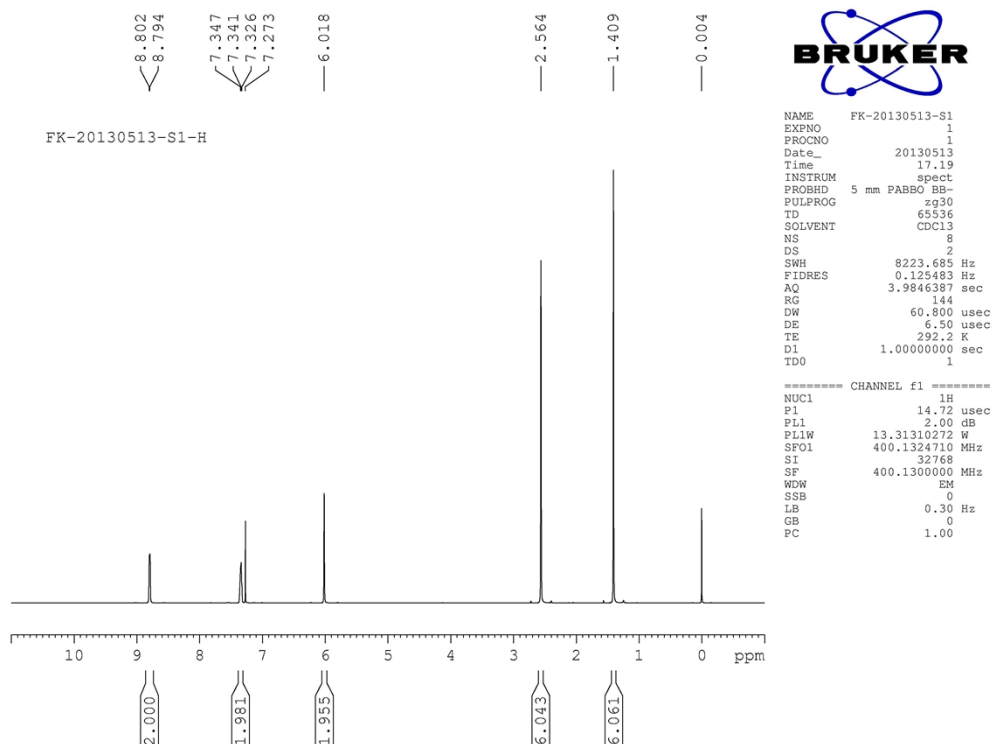

(b)

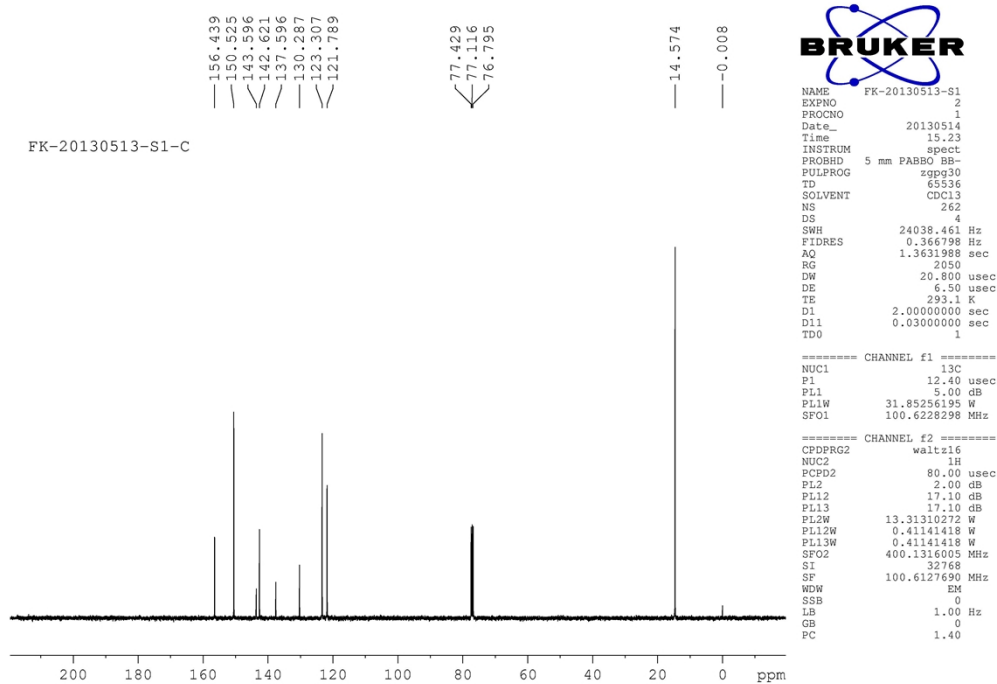

Figure S4. (a)  $^1\text{H}$  NMR and (b)  $^{13}\text{C}$  NMR spectrum of B1.

Electronic Supplementary Information for *PCCP*

(a)

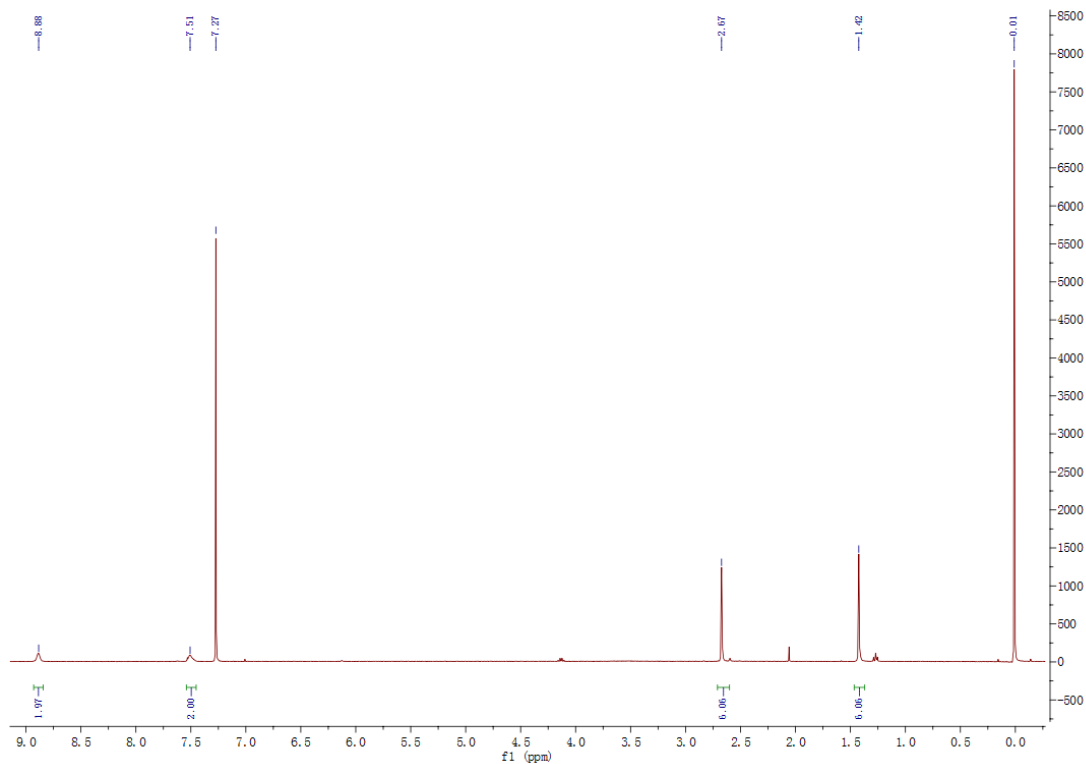

(b)

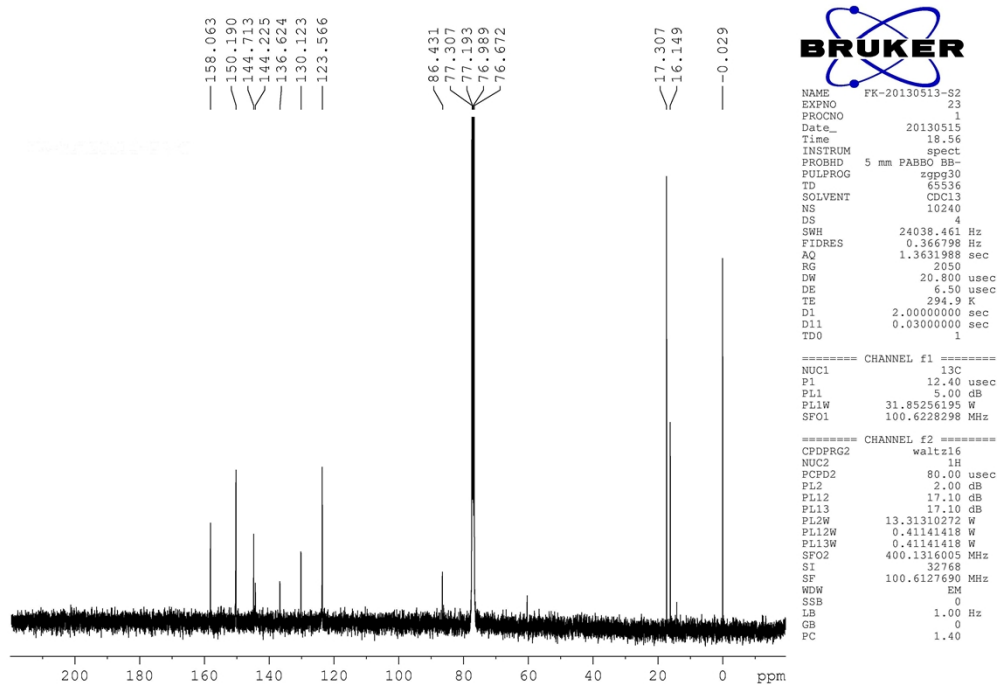

Figure S5. (a)  $^1\text{H}$  NMR and (b)  $^{13}\text{C}$  NMR spectrum of B2.

Electronic Supplementary Information for *PCCP*

(a)

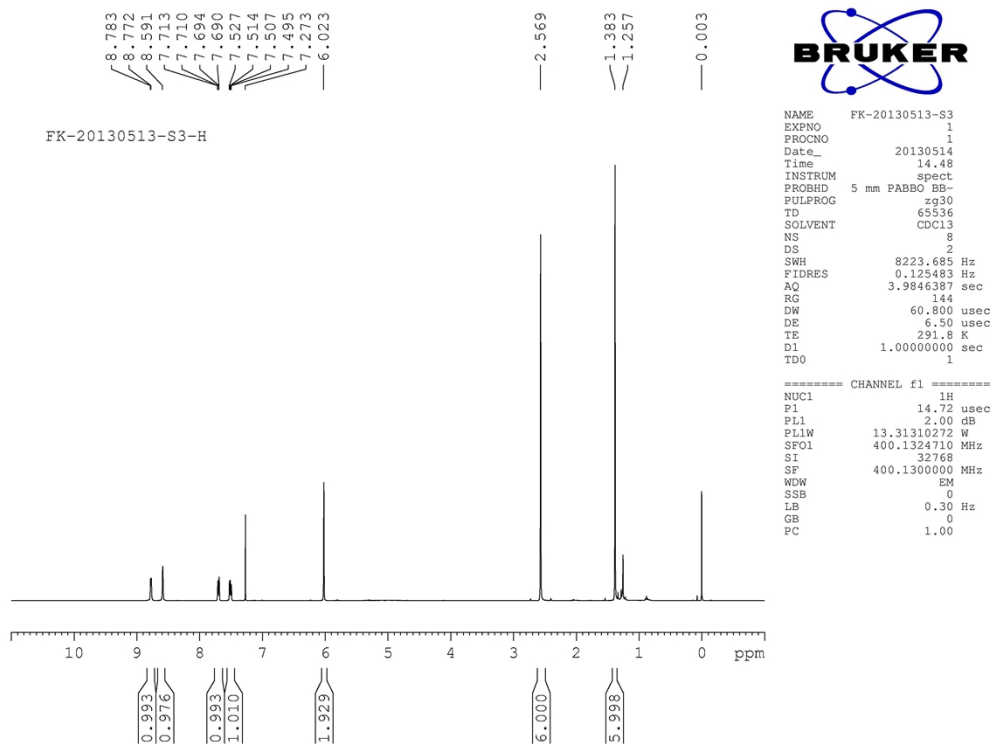

(b)

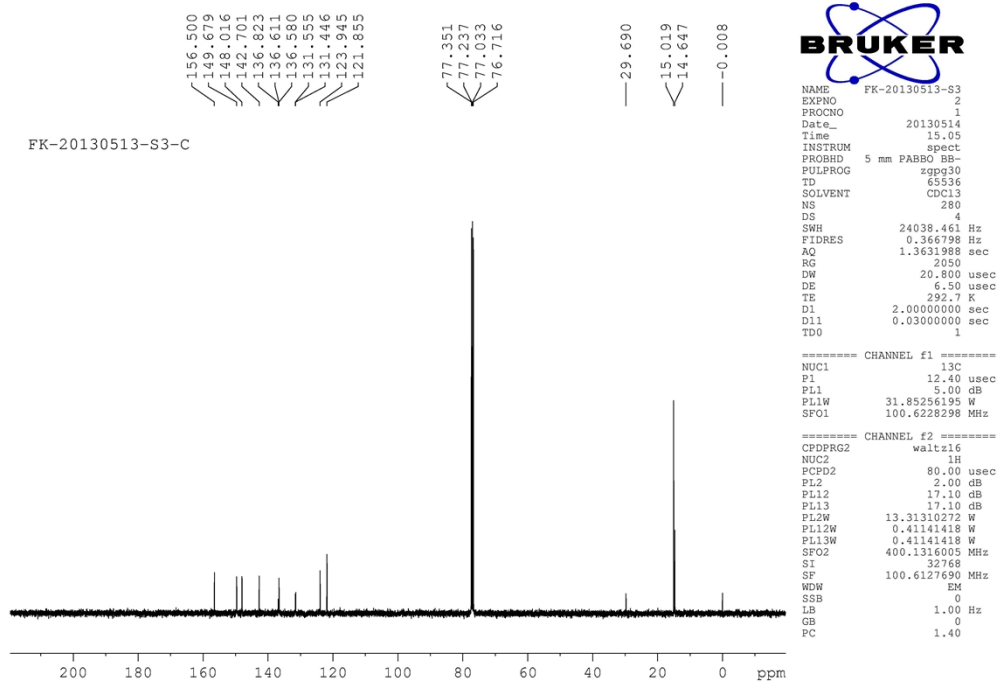

Figure S6. (a)  $^1\text{H}$  NMR and (b)  $^{13}\text{C}$  NMR spectrum of **B3**.

Electronic Supplementary Information for *PCCP*

(a)

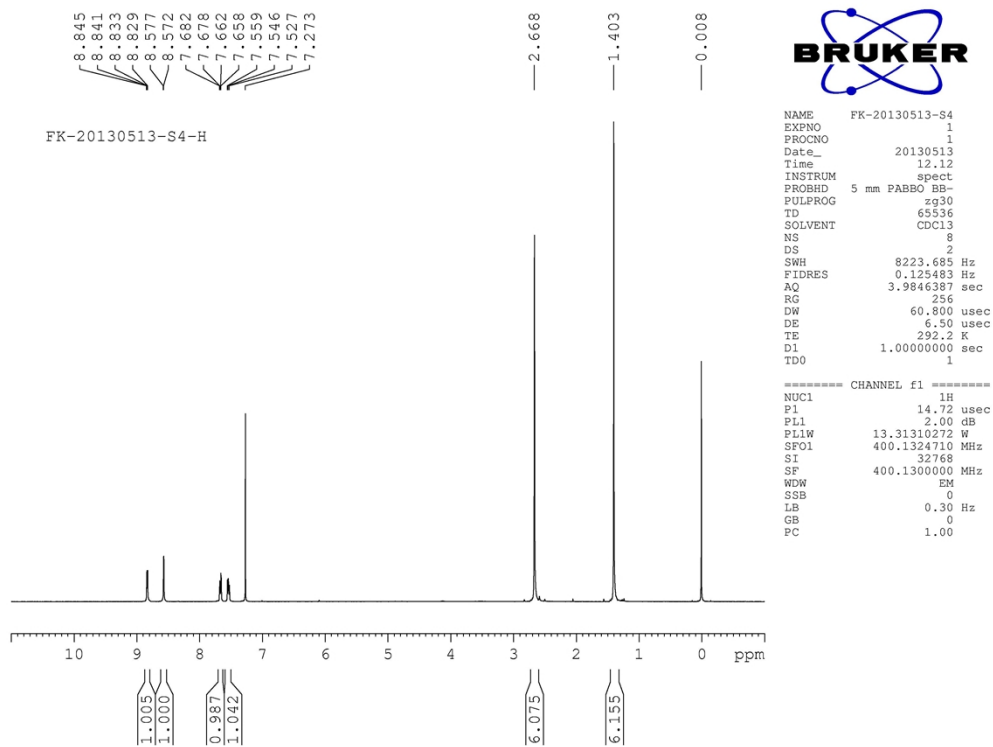

(b)

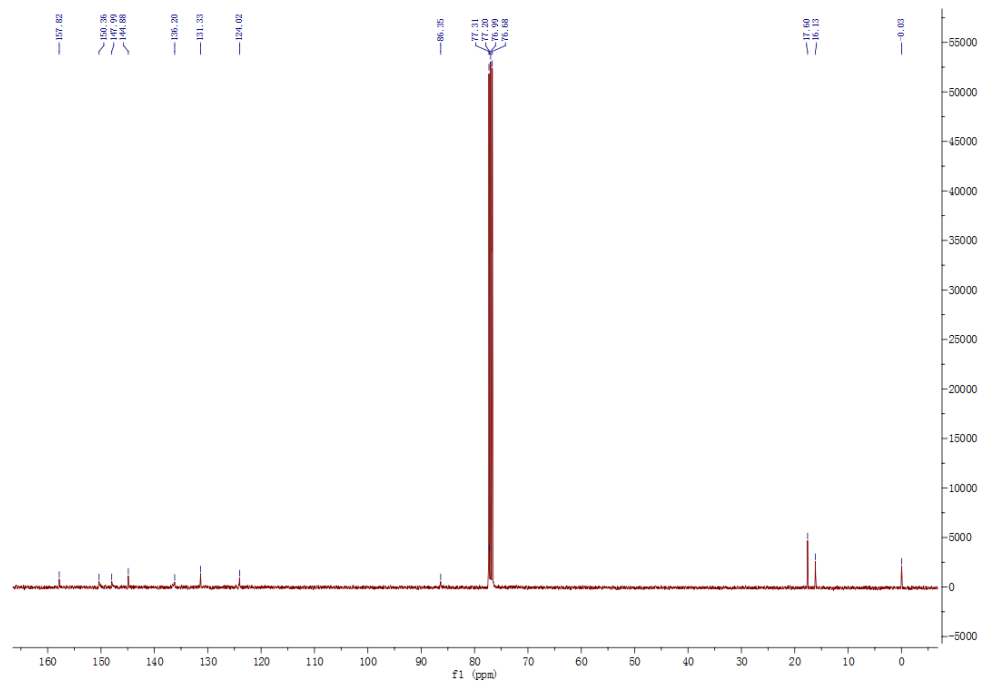

Figure S7. (a)  $^1\text{H}$  NMR and (b)  $^{13}\text{C}$  NMR spectrum of **B4**.



Electronic Supplementary Information for PCCP

(a)

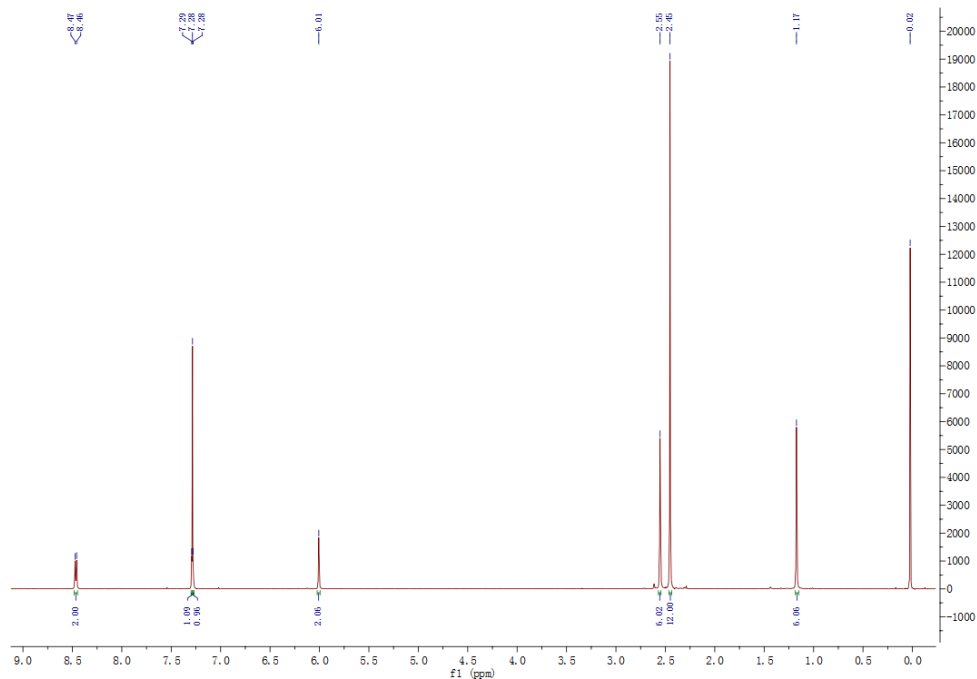

(b)

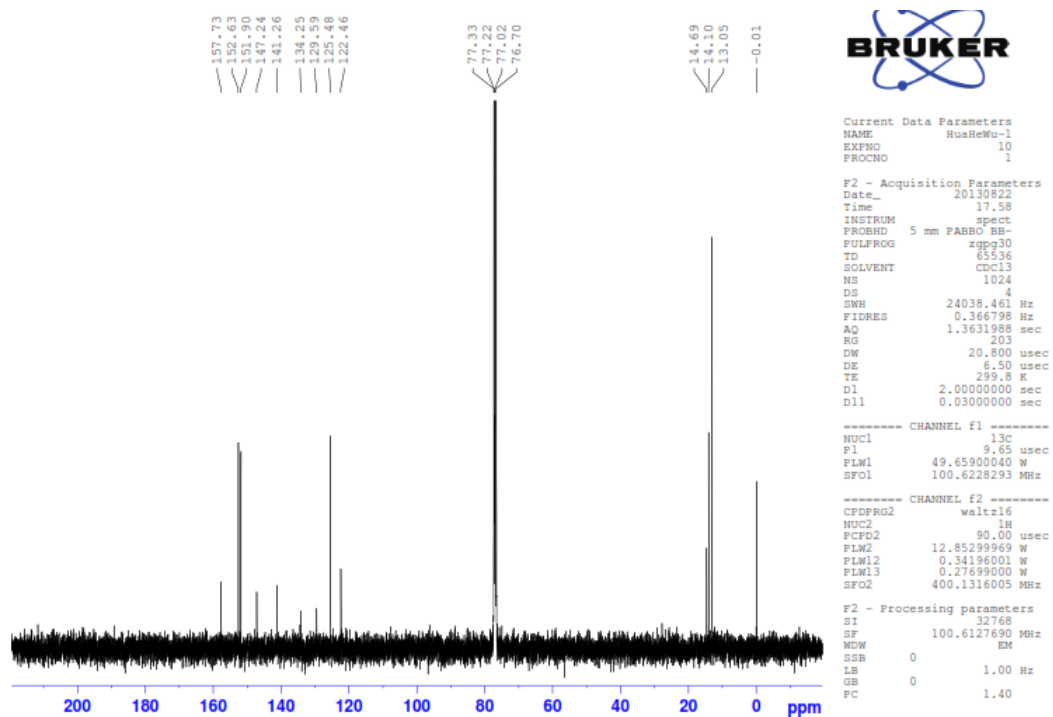

Figure S8. (a)  $^1\text{H}$  NMR and (b)  $^{13}\text{C}$  NMR spectrum of Co-B1.

(a)

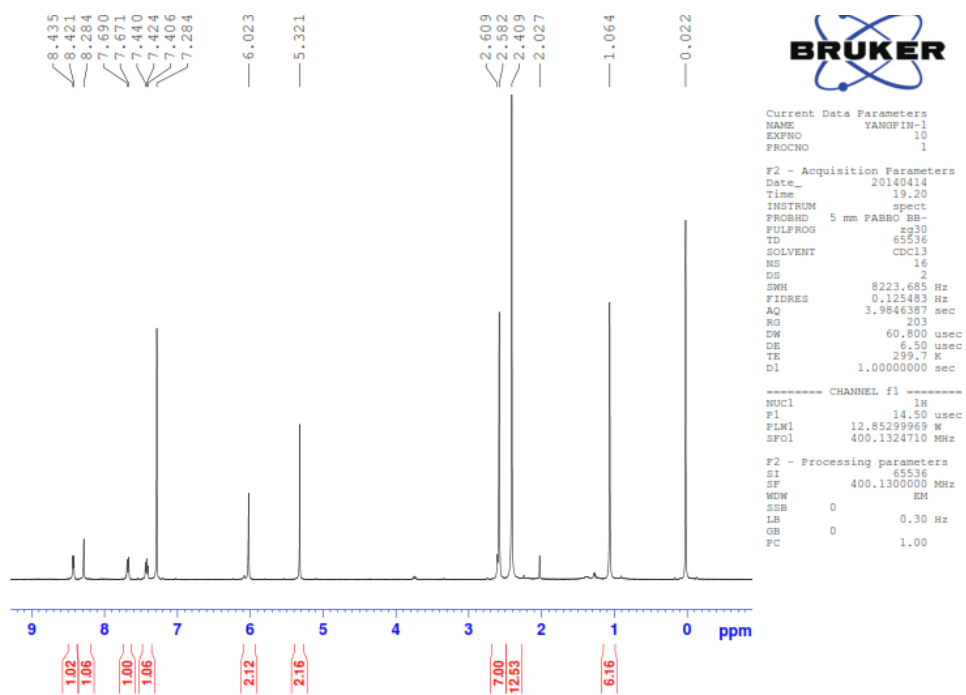

(b)

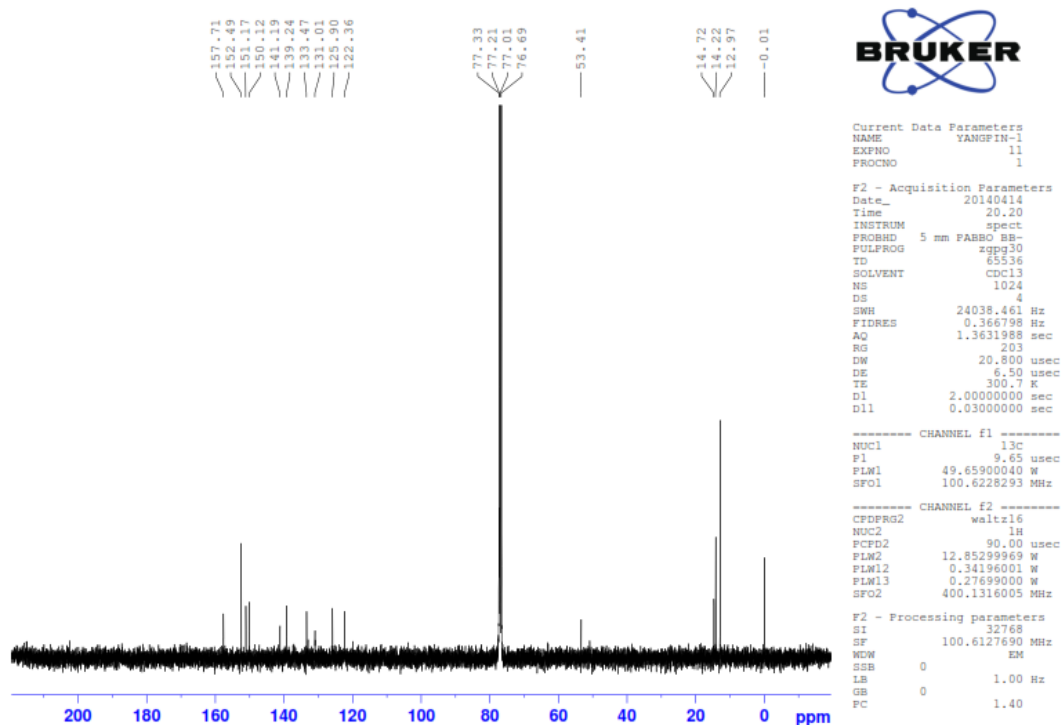

Figure S9. (a)  $^1\text{H}$  NMR and (b)  $^{13}\text{C}$  NMR spectrum of **Co-B3**.

Electronic Supplementary Information for *PCCP*

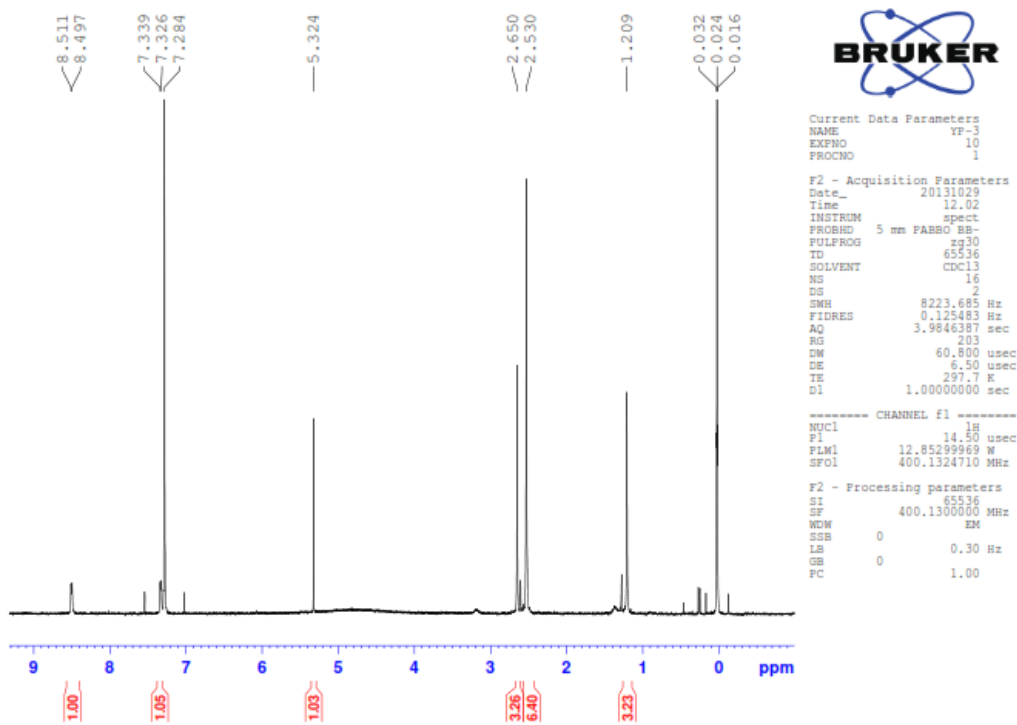

Figure S10. <sup>1</sup>H NMR spectrum of Co-B2.

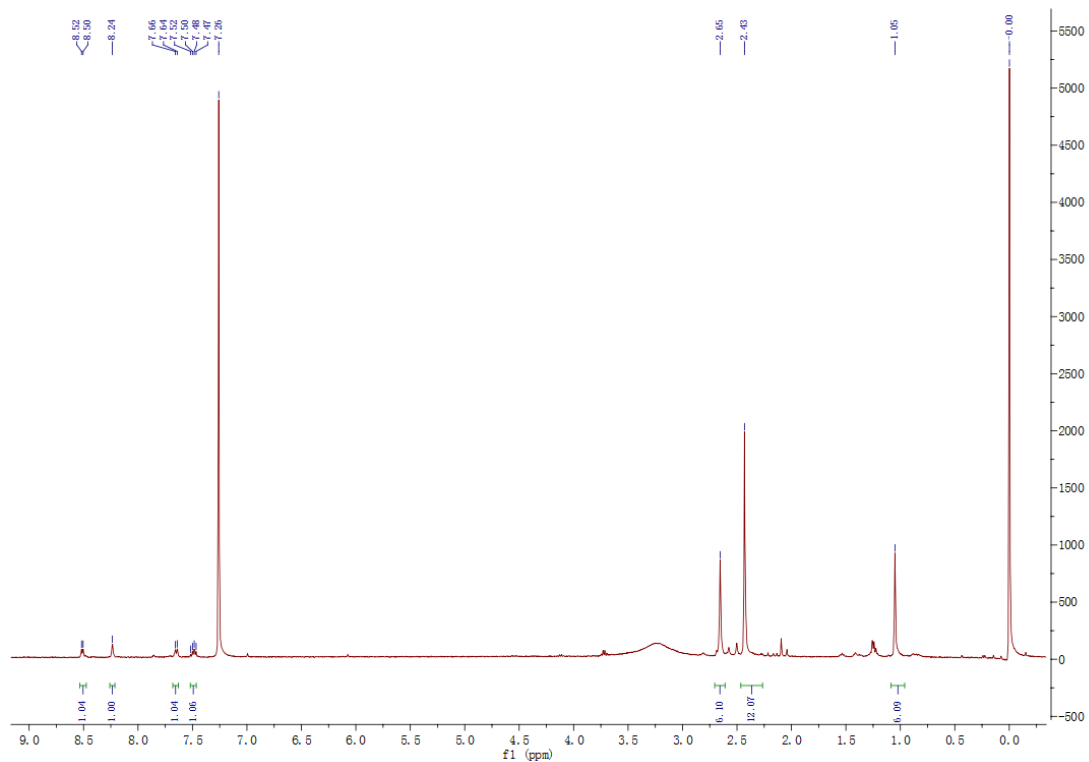

Figure S11. <sup>1</sup>H NMR spectrum of Co-B4.
